# Supplementary material for: Exploring the landscape of symbiotic diversity and distribution in unicellular ciliated protists
Source: PubMed Central journal article supplement (PMC11127453; doi:10.1186/s40168-024-01809-w), 2024-05-24
Supplement: 40168_2024_1809_MOESM1_ESM.pdf [file 40168_2024_1809_MOESM1_ESM.pdf]

## Supplementary Materials for

### **Exploring the landscape of symbiotic diversity and distribution in unicellular ciliated protists**

Bing Zhang<sup>1,2,^</sup>, Liwen Xiao<sup>2,^</sup>, Liping Lyu<sup>3</sup>, Fangqing Zhao<sup>1,2,4,\*</sup>, Miao Miao<sup>1,2,\*</sup>

#### **This PDF file includes:**

Figs. S1 to S7

Tables S1 to S4

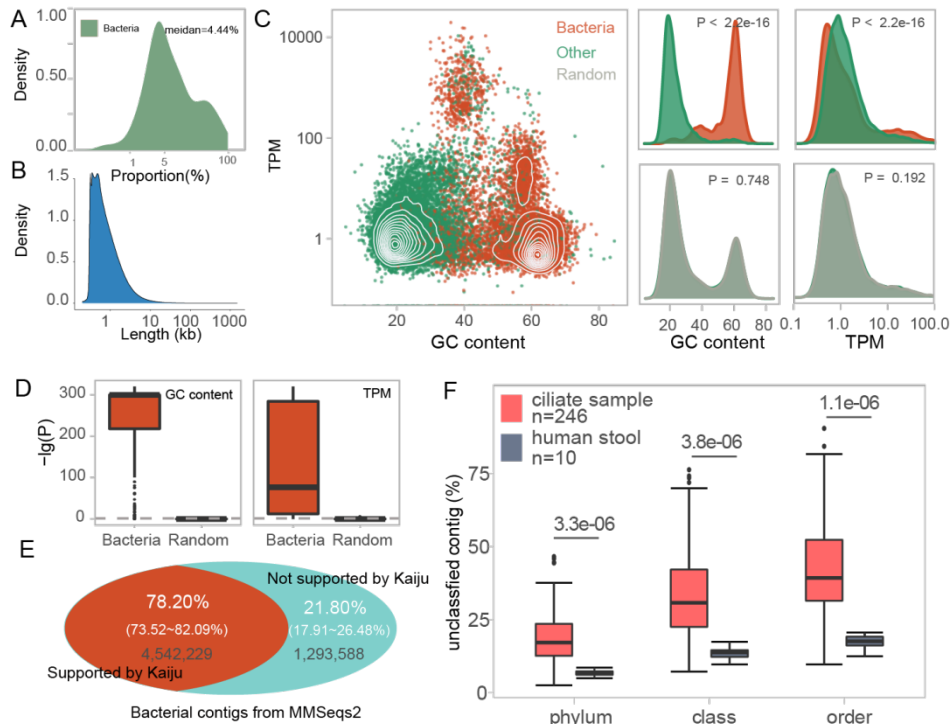

**Figure S1. Metagenome assembly and identification of ciliate-associated bacteria.**

(A) The length distribution of bacterial contigs. A total of 6,042,995 ciliate-associated bacterial contigs were analyzed. The mean contig length was 1197.44 bp. (B) Distribution of bacterial content among specimens. The bacterial-derived reads accounted for 4.44% of the total sequencing data. The density was generated automatically using the "geom\_density" function in ggplot. A transcript per million (TPM) like calculation to normalize the length of the contig and the sequencing depth of the sample when assessing the coverage of the contig. (C-E) Accuracy evaluation of contig classification. (C) The distribution of TPM and GC content between bacterial and host contigs. (D) Comparison of GC content (left) and TPM (right) between bacterial contigs and randomly selected control contigs for all specimens. The dashed line indicates the  $P$  value of 0.05. (E) The accuracy of contig taxonomic classification evaluated by another software. Numbers in brackets are 95% confidence intervals for the means. (F) Comparison of unclassified contigs in ciliate samples and human stool samples. The median of unclassified contigs assembled from ciliate samples were 17.18%, 30.77% and 39.26% at the phylum, class and order levels, respectively, compared to 6.66%, 13.78% and 17.60% for the human stool samples. Box-plot elements are defined as: center line, median; box limits, upper and lower quartiles; whiskers,  $1.5\times$  interquartile range; points, outliers.  $P$  values were measured by two-tailed Wilcoxon test.  $n$ , number of specimens. The proportion was calculated by dividing the total length of unclassified contigs by the total length of all contigs, and contigs smaller than 1 kb were filtered out.

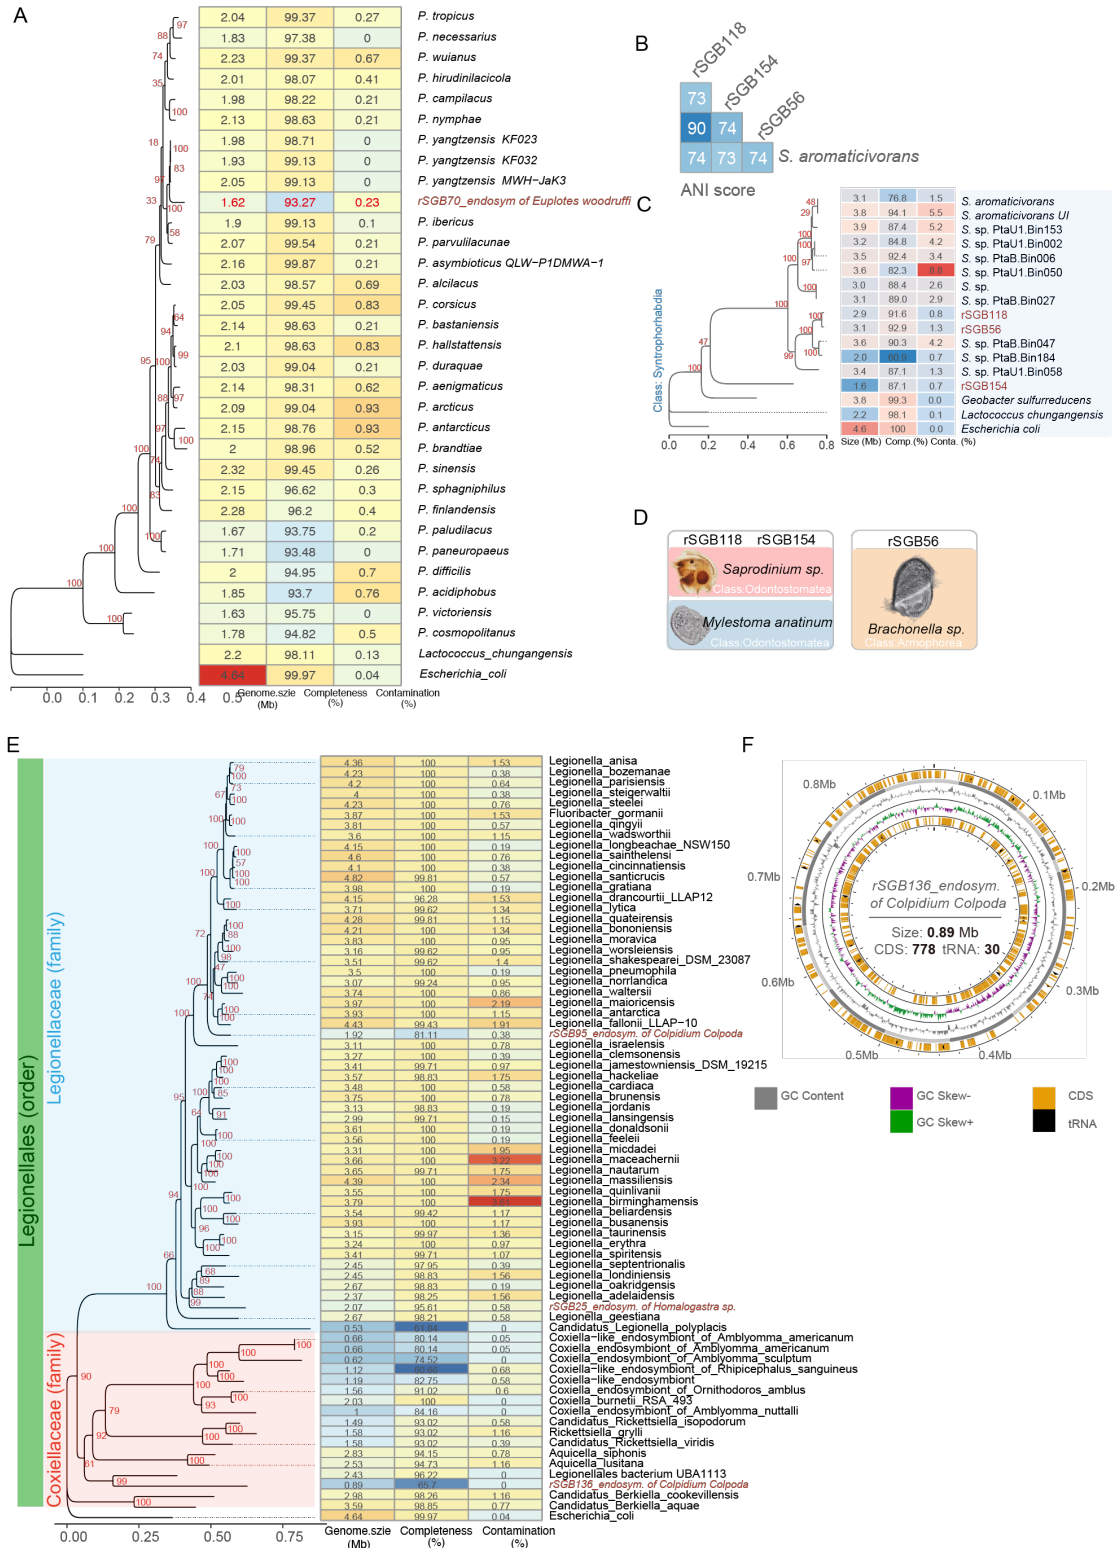

**Figure S2. New symbionts in ciliates.** (A) An approximately maximum-likelihood phylogenetic tree of *Syntrophorhabdia* was constructed. (B) An approximately maximum-likelihood phylogenetic tree of *Syntrophorhabdia* was constructed. From left to right: Maximum-likelihood phylogenetic tree, genome size, GC content, completeness, contamination rate, and rSGB ID. The *Escherichia coli* (GCF\_000005845) was used as outgroup. The scale bar represents the mean number of

nucleotide substitutions per site. Bootstrap values are indicated on the tree. (C) Average nucleotide identity assessment was performed to compare three symbionts (rSGB118, rSGB154, and rSGB56) with the representative species *Syntrophorhabdus aromaticivorans*. (D) The host species of the three symbionts. (E) The approximately maximum-likelihood phylogenetic tree of the order Legionellales. (F) Genomic characteristics of a representative endosymbiont, namely rSGB136. From the outer ring to the inner ring are the genes of positive strand, GC content, GC skew and negative strand genes, respectively.

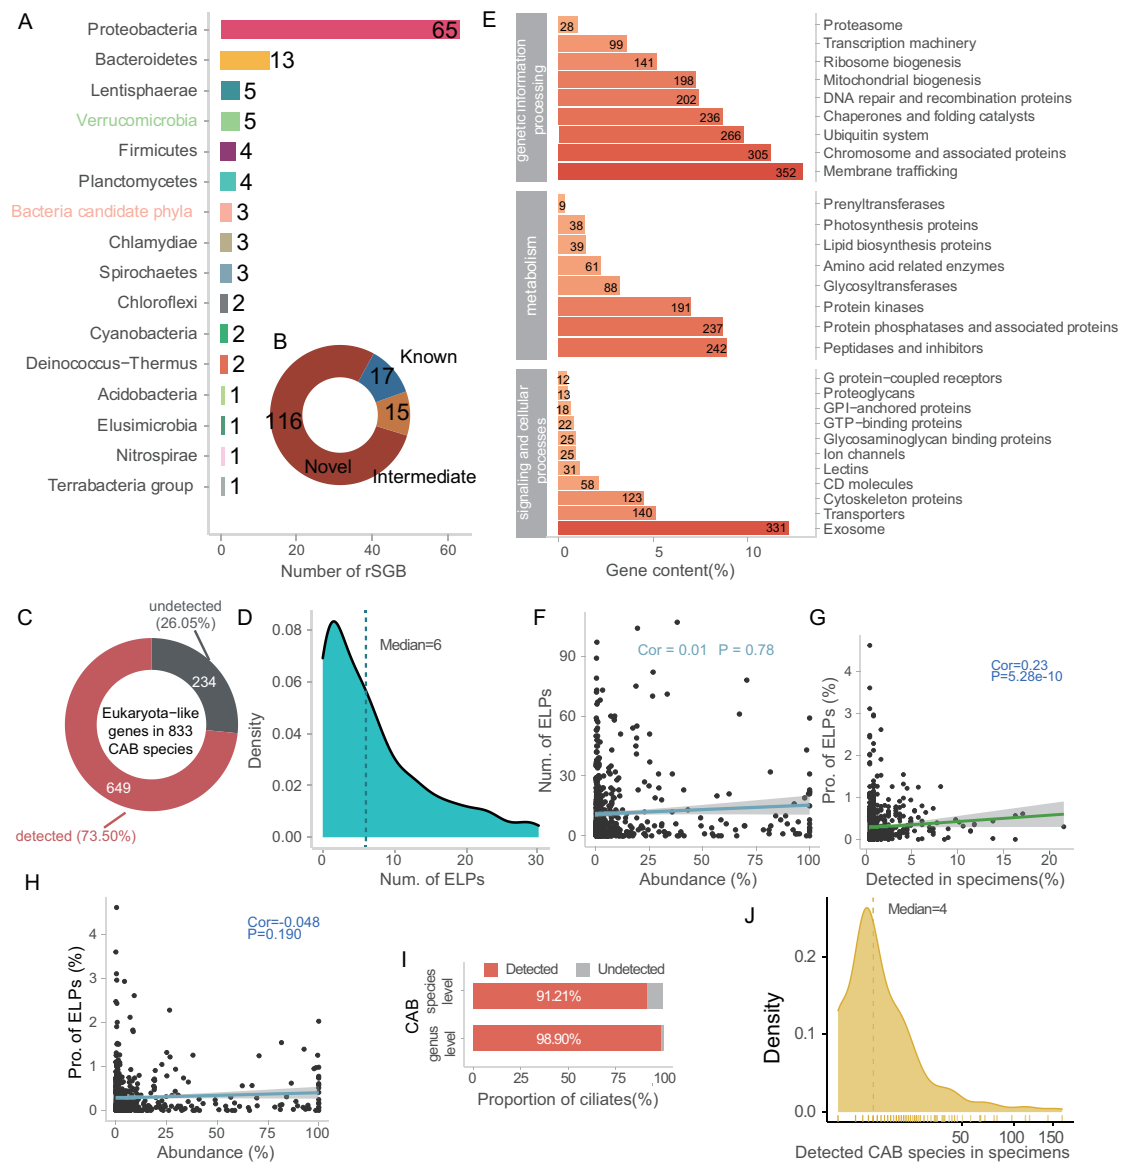

**Figure S3. Characteristics of ciliate-associated bacteria.** (A-B) The taxonomy of representative single genomic bins. (A) The count of novel rSGB in each phylum or clade. (B) The percentage of novel bacterial rSGBs. (C-H) Relationship between eukaryotic like proteins (ELPs) and symbionts. (C) ELPs were identified in 73.5% of CABs. (D) The distribution of the ELP counts in CAB species. The mean and median of the ELPs were 11.3 and 6, respectively. (E) KEGG functional classification of the ELPs. The color of bars represents the proportion of total ELPs. (F) Spearman correlation between the number of ELPs in CABs and their abundance in the host. (G-H) Spearman correlation between the proportion of ELPs in CAB and their prevalence (G) and abundance (H) in the host. (I) Detection of CABs in ciliates at species and genus level. (J) Distribution of 883 CAB species among 246 specimens. Each short bar denotes one specimen.

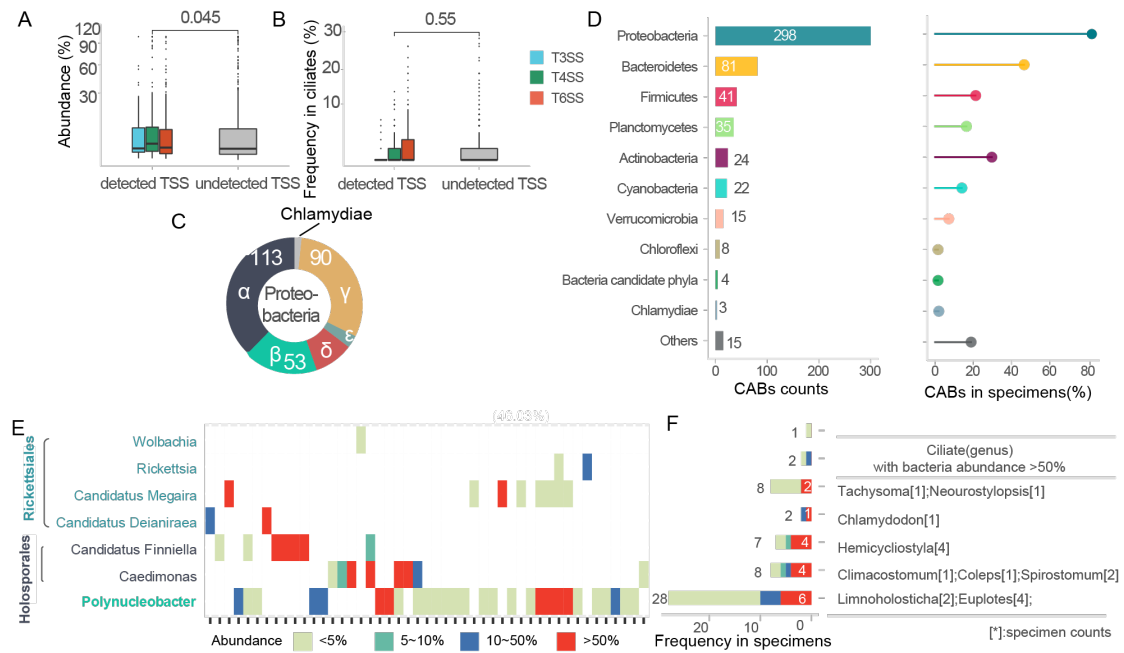

**Figure S4. Insights into CABs: infection rate, abundance, symbiotic distribution, and taxonomic analysis.** (A-B) Comparison of infection rate (A) and abundance (B) between CABs with and without secretion systems. The statistical significance was assessed using a two-tailed Wilcoxon test. (C) Distribution of *Proteobacteria* phylum at the class level. (E) Taxonomy (right) and frequency (left) of the 546 CAB genera at the phylum level. (F) Abundance of representative symbiotic bacteria in hosts. Each color block represents a sample. For instance, the *Polynucleobacter* detected in a total of 28 samples, originating from 15 ciliate species. These include one *Euplotes* ciliate and 14 non-*Euplotes* ciliates. Specifically, as follows: *Euplotes woodruffi* (n=4), *Brachonella* sp. (n=3), *Urocentrum* sp. (n=3), *Vorticella* sp. (n=3), *Campanella umbellaria* (n=2), *Epistylis* sp. (n=2), *Limnoholosticha viridis* nov. sp. (n=2), *Spirostomum* sp. (n=2), *Apodileptus visscheri* (n=1), *Caenomorpha medusula* (n=1), *Hemiamphisiella* sp. (n=1), *Licnophora lynghbycola* (n=1), *Metopus* sp. (n=1), *Strobilidium gyrans* (n=1), *Vaginicola* sp. (n=1). Here, "n" represents the number of samples detected *Polynucleobacter*. Different colors represent different abundance levels. (G) Statistics on the frequency of representative symbiotic bacteria present in the specimens. The number at the top of the bar represents the frequency of taxa detected in the specimen. The numbers in the red bar indicate the count of samples where the abundance exceeds 50%. The table on the right show hosts with >50% abundance.

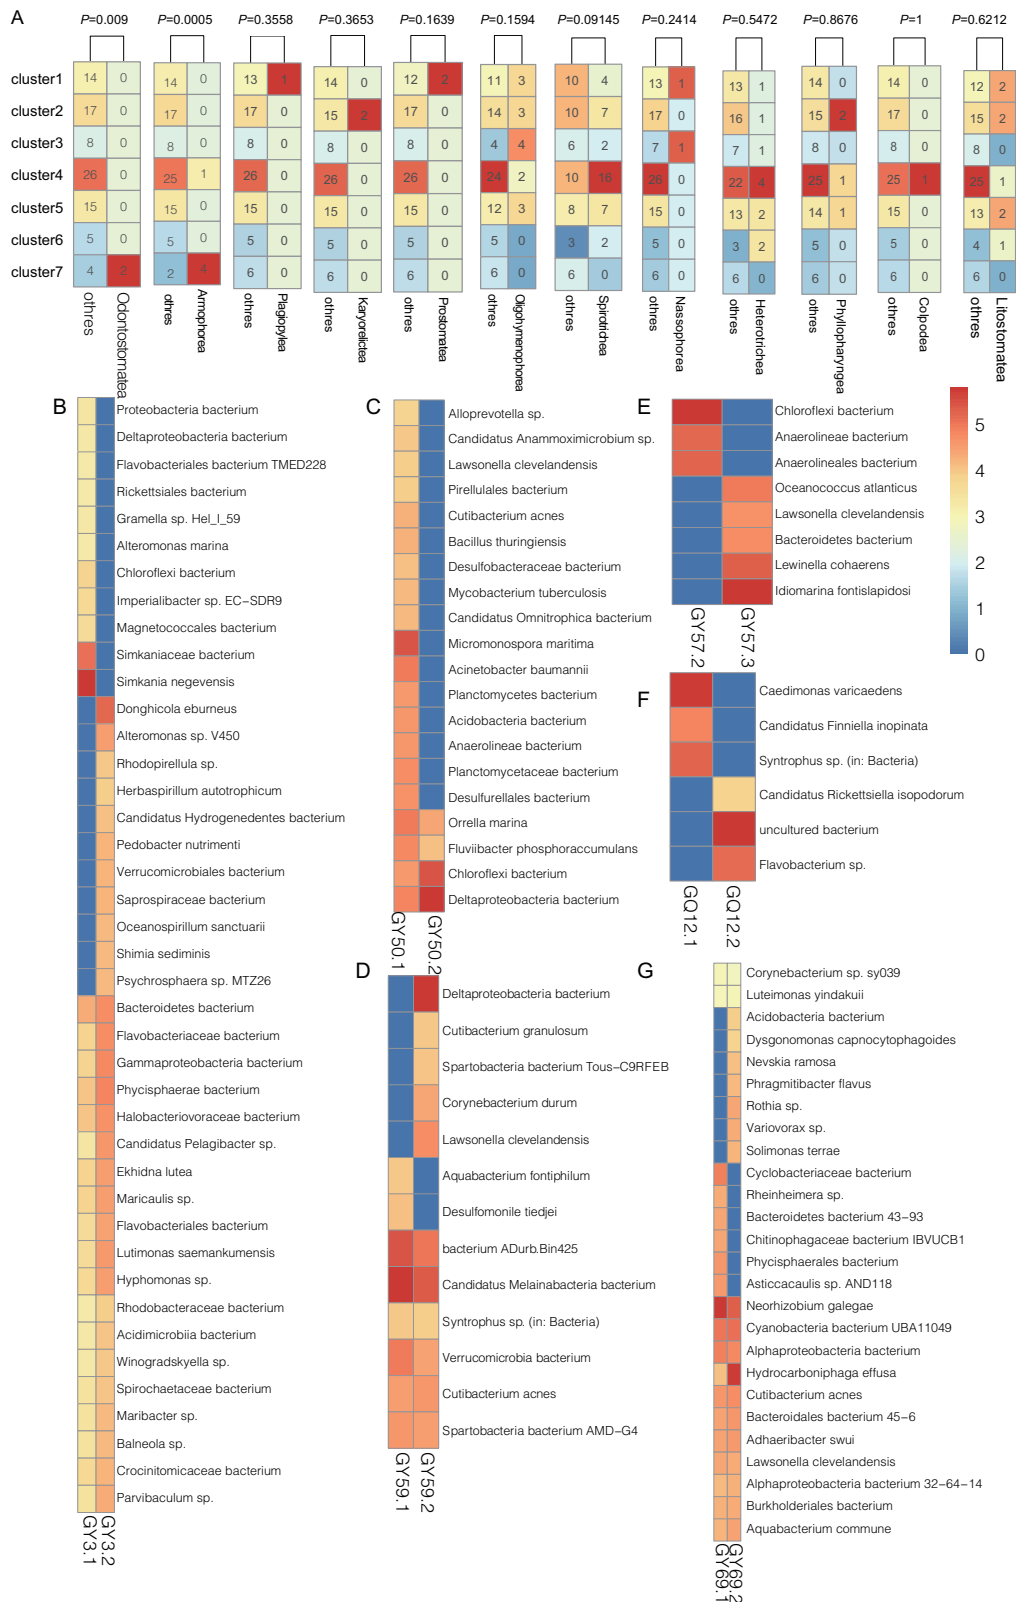

**Figure S5.** (A) Enrichment analysis of different CAB patterns at the host's class level. P-values were calculated using Fisher's test. (B-G) Variation in the bacterial community at the individual level of ciliates. The rows of the heatmap represent the two biological replicates of the host, the columns represent different symbiotic bacteria, and the colors indicate the abundance of the symbiotic bacteria.

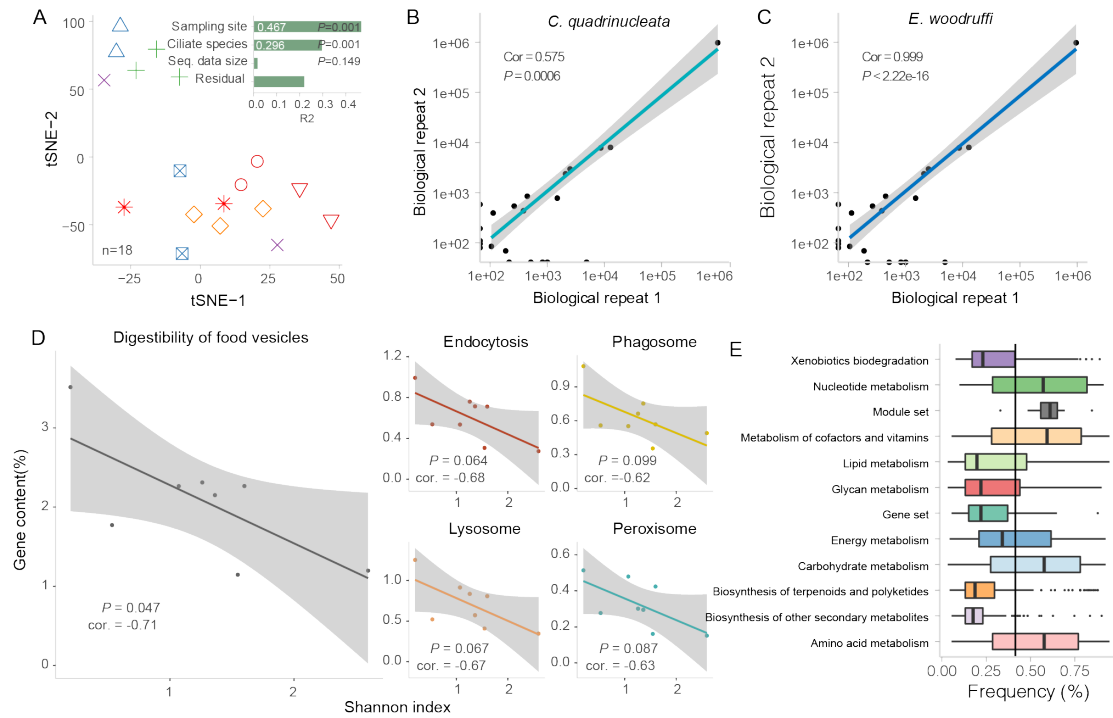

**Figure S6. Factors influencing the microbiota structure and functional analysis.**

(A) t-SNE analysis was conducted to examine the influencing factors of the ciliate symbiotic community. The R<sup>2</sup> value and P-value were calculated using the Permanova test. Each dot on the plot represents a distinct ciliate species, with the same color and shape indicating samples from the same sampling site. (B-C) Spearman correlation analysis was performed to assess the relationship between different biological replicates. The left panel (B) represents the analysis for *Certesias quadrinucleata*, while the right panel (C) represents the analysis for *Euplotes woodruffi*. (D) Pearson correlation analysis was employed to examine the correlation between gene content and the Shannon index of intracellular symbionts. The digestibility of food vesicles was defined by the inclusion of genes associated with endocytosis, phagosome, lysosome, and peroxisome. (E) The frequency of CAB genes from different functional classes was examined across 91 ciliate species.



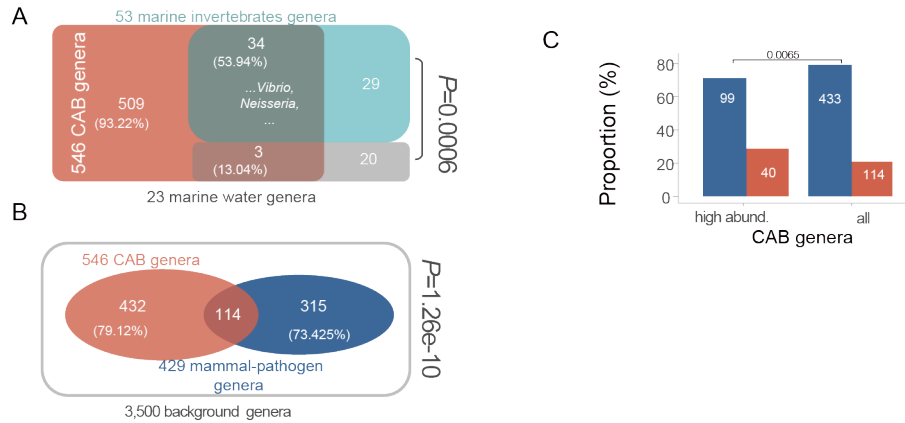

**Figure S7. The potential reservoirs for other symbiotic systems** (A) The Venn diagram illustrates the overlap between CABs and bacteria associated with marine invertebrates. (B) The Venn diagram represents the overlap between CABs and mammal pathogens. Fisher's test was used for statistical analysis in panels E and F. (C) High abundance of CAB is significantly enriched in mammalian pathogens. The significance was determined using the hypergeometric test. The blue bar represents CAB, while the orange bar represents mammal pathogens. Genera with a maximum abundance greater than 10% in the specimen were defined as high-abundance genera.

**Table S1. Specimen information of the collected ciliate species.**

| SpeciesName                        | SampleID | SpeciesIdentifier | Amplification | SequenceReads | AfterFilterReads | BacterialContent | Genus_shannon | Genus_simpson | Genus_richness | CellNumber |
|------------------------------------|----------|-------------------|---------------|---------------|------------------|------------------|---------------|---------------|----------------|------------|
| <i>Plagiopyla nasuta</i>           | GQ1.2    | SpeciesID:1       | MDA           | 73910316      | 49244383         | 0.04             | 1.90          | 0.51          | 2.00           | 1          |
| <i>Plagiopyla nasuta</i>           | GY1.1    | SpeciesID:1       | MALBAC        | 70759176      | 53367375         | 0.04             | 0.24          | 0.07          | 2.00           | 1          |
| <i>Loxodes</i>                     | GQ10.2   | SpeciesID:10      | MDA           | 94656435      | 63250237         | 0.02             | 2.42          | 0.59          | 3.00           | 1          |
| <i>Loxodes</i>                     | GY10.1   | SpeciesID:10      | MALBAC        | 65278788      | 49791888         | 0.21             | 1.89          | 0.62          | 13.00          | 1          |
| <i>Loxodes</i>                     | GY10.2   | SpeciesID:10      | MALBAC        | 80919834      | 61308149         | 0.24             | 1.62          | 0.58          | 11.00          | 1          |
| <i>Trachelocercidae sp.</i>        | GY11.1   | SpeciesID:11      | MALBAC        | 68688926      | 37528158         | 0.11             | 1.98          | 0.71          | 7.00           | 1          |
| <i>Trachelocercidae sp.</i>        | GY11.2   | SpeciesID:11      | MALBAC        | 73996655      | 51163810         | 0.23             | 1.70          | 0.56          | 9.00           | 1          |
| <i>Coleps</i>                      | GQ12.1   | SpeciesID:12      | MDA           | 68817049      | 41575572         | 0.08             | 1.69          | 0.48          | 3.00           | 1          |
| <i>Coleps</i>                      | GQ12.2   | SpeciesID:12      | MDA           | 78308041      | 43065956         | 0.03             | 1.80          | 0.46          | 3.00           | 1          |
| <i>Coleps</i>                      | GY12.1   | SpeciesID:12      | MALBAC        | 74559529      | 52892359         | 0.20             | 1.51          | 0.37          | 11.00          | 1          |
| <i>Coleps</i>                      | GY12.2   | SpeciesID:12      | MALBAC        | 90480533      | 60733562         | 0.05             | 1.83          | 0.46          | 15.00          | 1          |
| <i>Vaginicola</i>                  | GY13.1   | SpeciesID:13      | MALBAC        | 107732548     | 83494547         | 0.33             | 1.88          | 0.47          | 67.00          | 1          |
| <i>Vaginicola</i>                  | GY13.2   | SpeciesID:13      | MALBAC        | 103439392     | 74993065         | 0.23             | 1.84          | 0.46          | 39.00          | 1          |
| <i>Thuricola</i>                   | GY14.1   | SpeciesID:14      | MALBAC        | 87209123      | 52006590         | 0.09             | 1.94          | 0.50          | 28.00          | 1          |
| <i>Thuricola</i>                   | GY14.2   | SpeciesID:14      | MALBAC        | 92141259      | 56196171         | 0.09             | 1.83          | 0.45          | 29.00          | 1          |
| <i>Kiitricha marina</i>            | GQ15.2   | SpeciesID:15      | MDA           | 73414392      | 25694182         | 0.03             | 2.88          | 0.65          | 0.00           | 1          |
| <i>Kiitricha marina</i>            | GY15.1   | SpeciesID:15      | MALBAC        | 88812124      | 59011185         | 0.05             | 2.70          | 0.68          | 12.00          | 1          |
| <i>Kiitricha marina</i>            | GQ15.1   | SpeciesID:15      | MDA           | 74083375      | 27430361         | 0.03             | 2.90          | 0.67          | 1.00           | 1          |
| <i>Pseudoamphisiella alveolata</i> | GQ16.3   | SpeciesID:16      | MDA           | 66768262      | 28979607         | 0.06             | 1.65          | 0.46          | 2.00           | >1         |
| <i>Pseudoamphisiella alveolata</i> | GY16.1   | SpeciesID:16      | MALBAC        | 95882348      | 63582157         | 0.02             | 2.47          | 0.61          | 2.00           | 1          |
| <i>Pseudoamphisiella alveolata</i> | GY16.3   | SpeciesID:16      | MALBAC        | 79030794      | 53026077         | 0.01             | 2.46          | 0.63          | 2.00           | >1         |
| <i>Urorychia setigera</i>          | GQ17.2   | SpeciesID:17      | MDA           | 88688644      | 50218923         | 0.02             | 1.45          | 0.51          | 1.00           | 1          |
| <i>Urorychia setigera</i>          | GQ17.3   | SpeciesID:17      | MDA           | 82815384      | 47359851         | 0.02             | 2.19          | 0.66          | 1.00           | >1         |

|                                   |        |              |        |           |          |      |      |      |       |    |
|-----------------------------------|--------|--------------|--------|-----------|----------|------|------|------|-------|----|
| <i>Uronychia setigera</i>         | GY17.1 | SpeciesID:17 | MALBAC | 68660965  | 44745515 | 0.02 | 1.87 | 0.53 | 1.00  | 1  |
| <i>Uronychia setigera</i>         | GY17.2 | SpeciesID:17 | MALBAC | 73811811  | 47096219 | 0.02 | 1.98 | 0.54 | 1.00  | 1  |
| <i>Pleuronema sp.</i>             | GY18.2 | SpeciesID:18 | MALBAC | 114052613 | 75371000 | 0.04 | 2.03 | 0.62 | 4.00  | 1  |
| <i>Pleuronema sp.</i>             | GY18.4 | SpeciesID:18 | MALBAC | 78076501  | 51090414 | 0.08 | 2.08 | 0.61 | 11.00 | >1 |
| <i>Pleuronema sp.</i>             | GY18.5 | SpeciesID:18 | MALBAC | 78290999  | 49908820 | 0.06 | 1.99 | 0.57 | 11.00 | >1 |
| <i>Epistylis</i>                  | GY19.2 | SpeciesID:19 | MALBAC | 100298768 | 64871890 | 0.08 | 2.49 | 0.68 | 23.00 | 1  |
| <i>Epistylis</i>                  | GY19.3 | SpeciesID:19 | MALBAC | 95114592  | 63667560 | 0.09 | 2.27 | 0.66 | 17.00 | >1 |
| <i>Strombidinopsis sp</i>         | GQ2.2  | SpeciesID:2  | MDA    | 85412150  | 72265792 | 0.26 | 2.29 | 0.59 | 37.00 | 1  |
| <i>Strombidinopsis sp</i>         | GY2.1  | SpeciesID:2  | MALBAC | 71992178  | 45720211 | 0.11 | 1.45 | 0.60 | 11.00 | 1  |
| <i>Strombidinopsis sp</i>         | GY2.2  | SpeciesID:2  | MALBAC | 70479978  | 41005216 | 0.04 | 2.40 | 0.61 | 23.00 | 1  |
| <i>Pseudokeronopsis cf. flava</i> | GQ20.1 | SpeciesID:20 | MDA    | 93150894  | 41835127 | 0.09 | 2.09 | 0.65 | 2.00  | 1  |
| <i>Pseudokeronopsis cf. flava</i> | GQ20.2 | SpeciesID:20 | MDA    | 71952360  | 41014909 | 0.05 | 3.10 | 0.74 | 5.00  | 1  |
| <i>Pseudokeronopsis cf. flava</i> | GY20.2 | SpeciesID:20 | MALBAC | 68447346  | 36894927 | 0.01 | 2.44 | 0.67 | 1.00  | 1  |
| <i>Pseudokeronopsis cf. flava</i> | GY20.3 | SpeciesID:20 | MALBAC | 90495349  | 57484718 | 0.05 | 2.22 | 0.65 | 15.00 | >1 |
| <i>Euplotes sp</i>                | GQ21.2 | SpeciesID:21 | MDA    | 74794897  | 50556120 | 0.23 | 1.97 | 0.48 | 2.00  | 1  |
| <i>Euplotes sp</i>                | GQ21.3 | SpeciesID:21 | MDA    | 80132213  | 45758921 | 0.08 | 1.94 | 0.59 | 1.00  | >1 |
| <i>Euplotes sp</i>                | GY21.1 | SpeciesID:21 | MALBAC | 82017585  | 53503673 | 0.04 | 2.45 | 0.59 | 2.00  | 1  |
| <i>Euplotes sp</i>                | GY21.2 | SpeciesID:21 | MALBAC | 98824705  | 61475630 | 0.03 | 2.50 | 0.64 | 2.00  | 1  |
| <i>Euplotes woodruffi</i>         | GQ22.1 | SpeciesID:22 | MDA    | 87843889  | 82223850 | 0.84 | 1.47 | 0.62 | 5.00  | 1  |
| <i>Euplotes woodruffi</i>         | GQ22.3 | SpeciesID:22 | MDA    | 75952868  | 63704177 | 0.66 | 1.27 | 0.59 | 6.00  | >1 |
| <i>Euplotes woodruffi</i>         | GY22.1 | SpeciesID:22 | MALBAC | 67284466  | 51787191 | 0.27 | 1.71 | 0.69 | 10.00 | 1  |
| <i>Euplotes woodruffi</i>         | GY22.2 | SpeciesID:22 | MALBAC | 71197307  | 54538670 | 0.39 | 1.38 | 0.63 | 9.00  | 1  |
| <i>Vorticella sp.</i>             | GQ23.1 | SpeciesID:23 | MDA    | 82970530  | 23652207 | 0.03 | 2.23 | 0.61 | 3.00  | 1  |
| <i>Vorticella sp.</i>             | GQ23.2 | SpeciesID:23 | MDA    | 91858459  | 30270400 | 0.07 | 2.03 | 0.54 | 5.00  | 1  |
| <i>Vorticella sp.</i>             | GY23.1 | SpeciesID:23 | MALBAC | 94527658  | 41070070 | 0.04 | 2.06 | 0.62 | 5.00  | 1  |
| <i>Vorticella sp.</i>             | GY23.3 | SpeciesID:23 | MALBAC | 86445460  | 37080987 | 0.03 | 1.95 | 0.57 | 6.00  | >1 |

|                                     |        |              |        |          |          |      |      |      |       |    |
|-------------------------------------|--------|--------------|--------|----------|----------|------|------|------|-------|----|
| <b>Diophrys sp</b>                  | GQ24.1 | SpeciesID:24 | MDA    | 78252666 | 40765003 | 0.03 | 1.50 | 0.43 | 2.00  | 1  |
| <b>Diophrys sp</b>                  | GQ24.3 | SpeciesID:24 | MDA    | 79872167 | 42267830 | 0.03 | 1.27 | 0.38 | 1.00  | >1 |
| <b>Diophrys sp</b>                  | GY24.3 | SpeciesID:24 | MALBAC | 84365487 | 52166727 | 0.03 | 2.01 | 0.52 | 4.00  | >1 |
| <b>Zoothamnium sp.</b>              | GQ25.1 | SpeciesID:25 | MDA    | 68143055 | 29423024 | 0.03 | 2.09 | 0.52 | 0.00  | 1  |
| <b>Zoothamnium sp.</b>              | GQ25.3 | SpeciesID:25 | MDA    | 71438598 | 32486172 | 0.03 | 2.13 | 0.52 | 0.00  | >1 |
| <b>Zoothamnium sp.</b>              | GY25.2 | SpeciesID:25 | MALBAC | 78477008 | 47904175 | 0.02 | 2.24 | 0.56 | 1.00  | 1  |
| <b>Zoothamnium sp.</b>              | GY25.3 | SpeciesID:25 | MALBAC | 90111831 | 52774346 | 0.02 | 2.39 | 0.63 | 1.00  | >1 |
| <b>Paranassula sp.</b>              | GQ26.1 | SpeciesID:26 | MDA    | 83631037 | 43606226 | 0.02 | 1.85 | 0.52 | 0.00  | 1  |
| <b>Paranassula sp.</b>              | GQ26.2 | SpeciesID:26 | MDA    | 78042293 | 43098766 | 0.04 | 1.38 | 0.33 | 0.00  | 1  |
| <b>Paranassula sp.</b>              | GQ26.3 | SpeciesID:26 | MDA    | 78743652 | 42975465 | 0.02 | 1.96 | 0.55 | 0.00  | >1 |
| <b>Paranassula sp.</b>              | GY26.1 | SpeciesID:26 | MALBAC | 66839095 | 38681385 | 0.03 | 1.96 | 0.53 | 1.00  | 1  |
| <b>Paranassula sp.</b>              | GY26.2 | SpeciesID:26 | MALBAC | 63751313 | 45277333 | 0.06 | 1.95 | 0.54 | 8.00  | 1  |
| <b>Paranassula sp.</b>              | GY26.3 | SpeciesID:26 | MALBAC | 80709851 | 46602625 | 0.05 | 1.16 | 0.28 | 2.00  | >1 |
| <b>Lienophora lyngbycola</b>        | GQ27.2 | SpeciesID:27 | MDA    | 76646374 | 31770826 | 0.05 | 1.86 | 0.46 | 4.00  | 1  |
| <b>Lienophora lyngbycola</b>        | GQ27.3 | SpeciesID:27 | MDA    | 70781668 | 31747349 | 0.07 | 1.83 | 0.46 | 4.00  | >1 |
| <b>Lienophora lyngbycola</b>        | GY27.1 | SpeciesID:27 | MALBAC | 77946355 | 39575872 | 0.02 | 1.96 | 0.52 | 2.00  | 1  |
| <b>Lienophora lyngbycola</b>        | GY27.3 | SpeciesID:27 | MALBAC | 74082742 | 34410808 | 0.03 | 1.57 | 0.41 | 1.00  | >1 |
| <b>Hemiamphisiella sp.</b>          | GQ28.2 | SpeciesID:28 | MDA    | 80743185 | 37787596 | 0.23 | 2.02 | 0.60 | 14.00 | 1  |
| <b>Hemiamphisiella sp.</b>          | GQ28.3 | SpeciesID:28 | MDA    | 67076328 | 23876220 | 0.05 | 2.10 | 0.63 | 10.00 | >1 |
| <b>Trachelostyla pediculiformis</b> | GQ29.2 | SpeciesID:29 | MDA    | 69055254 | 36539228 | 0.08 | 2.67 | 0.67 | 9.00  | 1  |
| <b>Trachelostyla pediculiformis</b> | GQ29.3 | SpeciesID:29 | MDA    | 74783903 | 49603157 | 0.15 | 2.29 | 0.53 | 11.00 | >1 |
| <b>Trachelostyla pediculiformis</b> | GY29.1 | SpeciesID:29 | MALBAC | 84654471 | 47144318 | 0.03 | 2.50 | 0.59 | 5.00  | 1  |
| <b>Trachelostyla pediculiformis</b> | GY29.2 | SpeciesID:29 | MALBAC | 92203505 | 51375383 | 0.03 | 2.46 | 0.65 | 5.00  | 1  |
| <b>Tintinnopsis radix</b>           | GQ3.1  | SpeciesID:3  | MDA    | 74646140 | 50297387 | 0.30 | 1.27 | 0.46 | 18.00 | 1  |
| <b>Tintinnopsis radix</b>           | GY3.1  | SpeciesID:3  | MALBAC | 69715129 | 42041375 | 0.09 | 1.73 | 0.54 | 22.00 | 1  |
| <b>Tintinnopsis radix</b>           | GY3.2  | SpeciesID:3  | MALBAC | 71375311 | 45851687 | 0.03 | 2.66 | 0.63 | 21.00 | 1  |

|                                   |        |              |        |           |          |      |      |      |       |    |
|-----------------------------------|--------|--------------|--------|-----------|----------|------|------|------|-------|----|
| <i>Condylostoma sp.</i>           | GQ31.2 | SpeciesID:31 | MDA    | 86801317  | 29142473 | 0.02 | 1.93 | 0.49 | 0.00  | 1  |
| <i>Condylostoma sp.</i>           | GQ31.3 | SpeciesID:31 | MDA    | 65593095  | 23023331 | 0.02 | 2.09 | 0.51 | 0.00  | >1 |
| <i>Condylostoma sp.</i>           | GY31.1 | SpeciesID:31 | MALBAC | 83507014  | 37532588 | 0.02 | 1.84 | 0.51 | 0.00  | 1  |
| <i>Condylostoma sp.</i>           | GY31.2 | SpeciesID:31 | MALBAC | 70306633  | 30322749 | 0.02 | 1.63 | 0.44 | 2.00  | 1  |
| <i>Apocoleps sp.</i>              | GQ32.3 | SpeciesID:32 | MDA    | 78596290  | 47706988 | 0.04 | 2.18 | 0.60 | 0.00  | >1 |
| <i>Apocoleps sp.</i>              | GY32.1 | SpeciesID:32 | MALBAC | 83903747  | 67376526 | 0.36 | 1.37 | 0.47 | 9.00  | 1  |
| <i>Apocoleps sp.</i>              | GY32.3 | SpeciesID:32 | MALBAC | 86383806  | 65328879 | 0.32 | 1.46 | 0.48 | 15.00 | >1 |
| <i>Chaenea vorax</i>              | GQ33.2 | SpeciesID:33 | MDA    | 87403118  | 56309059 | 0.25 | 1.81 | 0.61 | 14.00 | 1  |
| <i>Chaenea vorax</i>              | GY33.1 | SpeciesID:33 | MALBAC | 90593465  | 63877380 | 0.12 | 2.14 | 0.66 | 20.00 | 1  |
| <i>Chaenea vorax</i>              | GY33.2 | SpeciesID:33 | MALBAC | 86181035  | 51367031 | 0.18 | 1.91 | 0.65 | 15.00 | 1  |
| <i>Loxophyllum sp.</i>            | GY34.1 | SpeciesID:34 | MALBAC | 75250504  | 43513038 | 0.03 | 1.84 | 0.53 | 4.00  | 1  |
| <i>Loxophyllum sp.</i>            | GY34.3 | SpeciesID:34 | MALBAC | 94850854  | 60898831 | 0.02 | 2.08 | 0.59 | 3.00  | >1 |
| <i>Amphileptus aeschtae</i>       | GQ35.2 | SpeciesID:35 | MDA    | 89934818  | 54923589 | 0.04 | 2.40 | 0.63 | 15.00 | 1  |
| <i>Amphileptus aeschtae</i>       | GQ35.3 | SpeciesID:35 | MDA    | 98473288  | 61473361 | 0.07 | 2.30 | 0.66 | 5.00  | >1 |
| <i>Amphileptus aeschtae</i>       | GY35.2 | SpeciesID:35 | MALBAC | 76840217  | 68314937 | 0.30 | 1.82 | 0.58 | 19.00 | 1  |
| <i>Amphileptus aeschtae</i>       | GY35.3 | SpeciesID:35 | MALBAC | 93250077  | 71250585 | 0.34 | 2.19 | 0.68 | 8.00  | >1 |
| <i>Hartmannula sinica</i>         | GY36.1 | SpeciesID:36 | MALBAC | 118688000 | 78060344 | 0.03 | 2.32 | 0.64 | 4.00  | 1  |
| <i>Hartmannula sinica</i>         | GY36.3 | SpeciesID:36 | MALBAC | 90975772  | 63037205 | 0.04 | 2.48 | 0.82 | 4.00  | >1 |
| <i>Gruberia uninucleat</i>        | GY37.1 | SpeciesID:37 | MALBAC | 102772668 | 59844975 | 0.02 | 2.36 | 0.65 | 5.00  | 1  |
| <i>Thigmokeronopsis rubra</i>     | GY38.1 | SpeciesID:38 | MALBAC | 80618765  | 44694147 | 0.05 | 2.21 | 0.53 | 6.00  | 1  |
| <i>Thigmokeronopsis rubra</i>     | GY38.2 | SpeciesID:38 | MALBAC | 76557256  | 40893009 | 0.04 | 2.24 | 0.54 | 4.00  | 1  |
| <i>Condylostentor auriculatus</i> | GQ39.2 | SpeciesID:39 | MDA    | 107161081 | 48675846 | 0.01 | 1.78 | 0.46 | 4.00  | 1  |
| <i>Condylostentor auriculatus</i> | GQ39.3 | SpeciesID:39 | MDA    | 95431998  | 42442112 | 0.01 | 1.74 | 0.45 | 0.00  | >1 |
| <i>Eutintinnus sp.</i>            | GQ4.1  | SpeciesID:4  | MDA    | 73578475  | 46228598 | 0.10 | 2.24 | 0.71 | 20.00 | 1  |
| <i>Eutintinnus sp.</i>            | GY4.1  | SpeciesID:4  | MALBAC | 67952390  | 44160626 | 0.02 | 2.53 | 0.63 | 22.00 | 1  |
| <i>Eutintinnus sp.</i>            | GY4.2  | SpeciesID:4  | MALBAC | 74216292  | 46759298 | 0.02 | 2.35 | 0.59 | 8.00  | 1  |

|                                     |        |              |        |           |          |      |      |      |       |    |
|-------------------------------------|--------|--------------|--------|-----------|----------|------|------|------|-------|----|
| <i>Sterkiella sp.</i>               | GQ40.2 | SpeciesID:40 | MDA    | 97462130  | 17199453 | 0.00 | 2.62 | 0.82 | 0.00  | 1  |
| <i>Sterkiella sp.</i>               | GQ40.3 | SpeciesID:40 | MDA    | 90852352  | 17064381 | 0.00 | 2.01 | 0.64 | 1.00  | >1 |
| <i>Colpidium Colpoda</i>            | GQ41.2 | SpeciesID:41 | MDA    | 89903430  | 34206975 | 0.03 | 1.88 | 0.66 | 2.00  | 1  |
| <i>Colpidium Colpoda</i>            | GQ41.3 | SpeciesID:41 | MDA    | 103918023 | 38646896 | 0.01 | 2.26 | 0.62 | 2.00  | >1 |
| <i>Didinium sp.</i>                 | GQ42.1 | SpeciesID:42 | MDA    | 129096601 | 81895476 | 0.02 | 2.27 | 0.73 | 6.00  | 1  |
| <i>Didinium sp.</i>                 | GQ42.3 | SpeciesID:42 | MDA    | 113402872 | 71615828 | 0.02 | 2.13 | 0.64 | 3.00  | >1 |
| <i>Frontonia sp.</i>                | GQ43.2 | SpeciesID:43 | MDA    | 94882108  | 14872232 | 0.01 | 2.27 | 0.59 | 1.00  | 1  |
| <i>Frontonia sp.</i>                | GQ43.3 | SpeciesID:43 | MDA    | 92064340  | 13080747 | 0.01 | 2.37 | 0.67 | 0.00  | >1 |
| <i>Stylonychia bifaria</i>          | GQ44.1 | SpeciesID:44 | MDA    | 79981095  | 25122538 | 0.03 | 1.90 | 0.63 | 3.00  | 1  |
| <i>Stylonychia bifaria</i>          | GQ44.2 | SpeciesID:44 | MDA    | 86452849  | 25989675 | 0.03 | 2.48 | 0.75 | 2.00  | 1  |
| <i>Dysteria derouxi</i>             | GQ45.1 | SpeciesID:45 | MDA    | 69494777  | 29523346 | 0.02 | 1.79 | 0.53 | 0.00  | 1  |
| <i>Dysteria derouxi</i>             | GQ45.3 | SpeciesID:45 | MDA    | 83838459  | 30373281 | 0.02 | 2.26 | 0.65 | 1.00  | >1 |
| <i>Dysteria derouxi</i>             | GY45.3 | SpeciesID:45 | MALBAC | 81838025  | 53522388 | 0.10 | 2.09 | 0.66 | 11.00 | >1 |
| <i>Rubrioxytricha haematoplasma</i> | GQ46.1 | SpeciesID:46 | MDA    | 77062895  | 36527979 | 0.02 | 1.93 | 0.58 | 3.00  | 1  |
| <i>Rubrioxytricha haematoplasma</i> | GQ46.2 | SpeciesID:46 | MDA    | 79141029  | 34265957 | 0.02 | 2.03 | 0.63 | 2.00  | 1  |
| <i>Rubrioxytricha haematoplasma</i> | GY46.2 | SpeciesID:46 | MALBAC | 76617935  | 23962811 | 0.06 | 2.31 | 0.67 | 18.00 | 1  |
| <i>Rubrioxytricha haematoplasma</i> | GY46.3 | SpeciesID:46 | MALBAC | 68493287  | 20256996 | 0.05 | 2.15 | 0.66 | 8.00  | >1 |
| <i>Uroleptus longicaudatus</i>      | GQ47.2 | SpeciesID:47 | MDA    | 80860810  | 20561491 | 0.01 | 2.55 | 0.82 | 3.00  | 1  |
| <i>Uroleptus longicaudatus</i>      | GQ47.3 | SpeciesID:47 | MDA    | 74998153  | 23782385 | 0.02 | 1.28 | 0.44 | 2.00  | >1 |
| <i>Uroleptus longicaudatus</i>      | GY47.1 | SpeciesID:47 | MALBAC | 81437658  | 30364494 | 0.04 | 2.65 | 0.78 | 9.00  | 1  |
| <i>Uroleptus longicaudatus</i>      | GY47.2 | SpeciesID:47 | MALBAC | 77639177  | 34449972 | 0.07 | 2.64 | 0.73 | 19.00 | 1  |
| <i>Tachysoma pellionellum</i>       | GQ48.1 | SpeciesID:48 | MDA    | 74347117  | 28495181 | 0.03 | 1.90 | 0.54 | 2.00  | 1  |
| <i>Tachysoma pellionellum</i>       | GQ48.3 | SpeciesID:48 | MDA    | 88843037  | 43268692 | 0.10 | 1.37 | 0.62 | 2.00  | >1 |
| <i>Tachysoma pellionellum</i>       | GY48.2 | SpeciesID:48 | MALBAC | 66866034  | 28407614 | 0.03 | 2.63 | 0.68 | 11.00 | 1  |
| <i>Tachysoma pellionellum</i>       | GY48.3 | SpeciesID:48 | MALBAC | 71143316  | 29917364 | 0.02 | 2.57 | 0.66 | 9.00  | >1 |
| <i>Mylestoma anatinum</i>           | GQ49.1 | SpeciesID:49 | MDA    | 81800812  | 65669467 | 0.48 | 1.53 | 0.58 | 2.00  | 1  |

|                                 |        |              |        |           |          |      |      |      |       |    |
|---------------------------------|--------|--------------|--------|-----------|----------|------|------|------|-------|----|
| <b>Mylestoma anatinum</b>       | GQ49.3 | SpeciesID:49 | MDA    | 109854831 | 70339969 | 0.29 | 1.56 | 0.61 | 5.00  | >1 |
| <b>Mylestoma anatinum</b>       | GY49.2 | SpeciesID:49 | MALBAC | 71937684  | 48591132 | 0.27 | 1.43 | 0.33 | 29.00 | 1  |
| <b>Mylestoma anatinum</b>       | GY49.3 | SpeciesID:49 | MALBAC | 66584818  | 48729199 | 0.31 | 0.74 | 0.21 | 5.00  | >1 |
| <b>Euplotes cf. woodruffi</b>   | GQ5.1  | SpeciesID:5  | MDA    | 78863235  | 47438854 | 0.44 | 0.60 | 0.20 | 6.00  | 1  |
| <b>Euplotes cf. woodruffi</b>   | GY5.1  | SpeciesID:5  | MALBAC | 76086239  | 49826050 | 0.06 | 0.78 | 0.22 | 2.00  | 1  |
| <b>Euplotes cf. woodruffi</b>   | GY5.2  | SpeciesID:5  | MALBAC | 71812371  | 48088168 | 0.06 | 0.69 | 0.18 | 7.00  | 1  |
| <b>Brachonella sp.</b>          | GQ50.2 | SpeciesID:50 | MDA    | 94797938  | 87298103 | 0.70 | 1.60 | 0.63 | 11.00 | 1  |
| <b>Brachonella sp.</b>          | GQ50.3 | SpeciesID:50 | MDA    | 85664856  | 78389152 | 0.72 | 1.37 | 0.51 | 9.00  | >1 |
| <b>Brachonella sp.</b>          | GY50.1 | SpeciesID:50 | MALBAC | 93593692  | 63097358 | 0.05 | 2.80 | 0.68 | 20.00 | 1  |
| <b>Brachonella sp.</b>          | GY50.2 | SpeciesID:50 | MALBAC | 75999481  | 40962616 | 0.04 | 2.21 | 0.63 | 2.00  | 1  |
| <b>Climacostomum sp.</b>        | GQ51.1 | SpeciesID:51 | MDA    | 99459173  | 42291288 | 0.16 | 0.83 | 0.30 | 2.00  | 1  |
| <b>Climacostomum sp.</b>        | GQ51.2 | SpeciesID:51 | MDA    | 100068930 | 35202615 | 0.06 | 1.22 | 0.46 | 1.00  | 1  |
| <b>Climacostomum sp.</b>        | GY51.2 | SpeciesID:51 | MALBAC | 76709676  | 35784912 | 0.03 | 1.77 | 0.69 | 2.00  | 1  |
| <b>Climacostomum sp.</b>        | GY51.3 | SpeciesID:51 | MALBAC | 72212093  | 34914539 | 0.03 | 1.68 | 0.64 | 1.00  | >1 |
| <b>Urostyla sp</b>              | GQ52.1 | SpeciesID:52 | MDA    | 85737024  | 35258089 | 0.01 | 2.95 | 0.81 | 3.00  | 1  |
| <b>Urostyla sp</b>              | GQ52.2 | SpeciesID:52 | MDA    | 104706167 | 57619439 | 0.03 | 1.80 | 0.64 | 2.00  | 1  |
| <b>Urostyla sp</b>              | GY52.2 | SpeciesID:52 | MALBAC | 87566242  | 37240924 | 0.11 | 1.47 | 0.64 | 2.00  | 1  |
| <b>Urostyla sp</b>              | GY52.3 | SpeciesID:52 | MALBAC | 82293288  | 39518110 | 0.07 | 2.13 | 0.79 | 14.00 | >1 |
| <b>Peritromus cf. kahli</b>     | GQ53.2 | SpeciesID:53 | MDA    | 107028231 | 45434828 | 0.03 | 2.54 | 0.58 | 3.00  | 1  |
| <b>Peritromus cf. kahli</b>     | GQ53.3 | SpeciesID:53 | MDA    | 97318652  | 41500763 | 0.04 | 2.59 | 0.59 | 2.00  | >1 |
| <b>Peritromus cf. kahli</b>     | GY53.2 | SpeciesID:53 | MALBAC | 71680674  | 38815600 | 0.02 | 2.39 | 0.58 | 0.00  | 1  |
| <b>Peritromus cf. kahli</b>     | GY53.3 | SpeciesID:53 | MALBAC | 81007352  | 41271851 | 0.03 | 2.44 | 0.63 | 1.00  | >1 |
| <b>Apoholosticha cf. sinica</b> | GQ54.1 | SpeciesID:54 | MDA    | 95540667  | 44859146 | 0.20 | 0.62 | 0.23 | 6.00  | 1  |
| <b>Apoholosticha cf. sinica</b> | GQ54.2 | SpeciesID:54 | MDA    | 94479908  | 41617563 | 0.09 | 0.19 | 0.06 | 5.00  | 1  |
| <b>Apoholosticha cf. sinica</b> | GY54.2 | SpeciesID:54 | MALBAC | 78816618  | 46093244 | 0.03 | 1.46 | 0.56 | 9.00  | 1  |
| <b>Apoholosticha cf. sinica</b> | GY54.3 | SpeciesID:54 | MALBAC | 75181323  | 43478397 | 0.02 | 0.79 | 0.28 | 7.00  | >1 |

|                               |        |              |        |           |          |      |      |      |       |    |
|-------------------------------|--------|--------------|--------|-----------|----------|------|------|------|-------|----|
| <b>Chlamydodon bourlandi</b>  | GQ55.2 | SpeciesID:55 | MDA    | 76396015  | 31415593 | 0.13 | 1.72 | 0.66 | 2.00  | 1  |
| <b>Chlamydodon bourlandi</b>  | GQ55.3 | SpeciesID:55 | MDA    | 72461002  | 24132833 | 0.10 | 1.66 | 0.64 | 2.00  | >1 |
| <b>Chlamydodon bourlandi</b>  | GY55.1 | SpeciesID:55 | MALBAC | 87685218  | 48407463 | 0.02 | 2.62 | 0.76 | 2.00  | 1  |
| <b>Chlamydodon bourlandi</b>  | GY55.2 | SpeciesID:55 | MALBAC | 78692850  | 45161157 | 0.02 | 2.49 | 0.69 | 1.00  | 1  |
| <b>Aspidisca leptaspis</b>    | GQ56.2 | SpeciesID:56 | MDA    | 90136574  | 75223993 | 0.17 | 2.16 | 0.69 | 18.00 | 1  |
| <b>Aspidisca leptaspis</b>    | GQ56.3 | SpeciesID:56 | MDA    | 95698023  | 61567534 | 0.26 | 2.78 | 0.68 | 35.00 | >1 |
| <b>Aspidisca leptaspis</b>    | GY56.2 | SpeciesID:56 | MALBAC | 84901985  | 54407264 | 0.03 | 2.67 | 0.59 | 11.00 | 1  |
| <b>Aspidisca leptaspis</b>    | GY56.3 | SpeciesID:56 | MALBAC | 74956103  | 58100811 | 0.01 | 2.68 | 0.66 | 2.00  | >1 |
| <b>Urosoma emarginata</b>     | GQ57.2 | SpeciesID:57 | MDA    | 68817049  | 27283472 | 0.01 | 1.61 | 0.47 | 1.00  | 1  |
| <b>Urosoma emarginata</b>     | GQ57.3 | SpeciesID:57 | MDA    | 93881348  | 31387473 | 0.01 | 1.93 | 0.60 | 0.00  | >1 |
| <b>Urosoma emarginata</b>     | GY57.2 | SpeciesID:57 | MALBAC | 81649133  | 30779096 | 0.01 | 2.07 | 0.59 | 2.00  | 1  |
| <b>Urosoma emarginata</b>     | GY57.3 | SpeciesID:57 | MALBAC | 81705248  | 30160346 | 0.02 | 2.53 | 0.75 | 13.00 | >1 |
| <b>Frontonia tchibisovae</b>  | GQ58.1 | SpeciesID:58 | MDA    | 80420072  | 26731118 | 0.01 | 2.22 | 0.57 | 0.00  | 1  |
| <b>Frontonia tchibisovae</b>  | GQ58.3 | SpeciesID:58 | MDA    | 72025132  | 24474849 | 0.02 | 2.22 | 0.68 | 0.00  | >1 |
| <b>Frontonia tchibisovae</b>  | GY58.1 | SpeciesID:58 | MALBAC | 76902726  | 48460270 | 0.17 | 2.45 | 0.67 | 16.00 | 1  |
| <b>Frontonia tchibisovae</b>  | GY58.2 | SpeciesID:58 | MALBAC | 78112156  | 46131632 | 0.06 | 2.12 | 0.56 | 11.00 | 1  |
| <b>Urostomides sp.</b>        | GQ59.1 | SpeciesID:59 | MDA    | 79188996  | 56693765 | 0.41 | 1.64 | 0.67 | 4.00  | 1  |
| <b>Urostomides sp.</b>        | GQ59.2 | SpeciesID:59 | MDA    | 86377102  | 58956891 | 0.23 | 1.15 | 0.41 | 3.00  | 1  |
| <b>Urostomides sp.</b>        | GY59.1 | SpeciesID:59 | MALBAC | 83775876  | 54020409 | 0.04 | 1.88 | 0.55 | 9.00  | 1  |
| <b>Urostomides sp.</b>        | GY59.2 | SpeciesID:59 | MALBAC | 87685727  | 54265458 | 0.03 | 2.06 | 0.54 | 11.00 | 1  |
| <b>Favella sp.</b>            | GQ6.2  | SpeciesID:6  | MDA    | 107553981 | 94705299 | 0.32 | 1.60 | 0.47 | 13.00 | 1  |
| <b>Favella sp.</b>            | GY6.1  | SpeciesID:6  | MALBAC | 78071126  | 47285635 | 0.04 | 2.62 | 0.66 | 10.00 | 1  |
| <b>Favella sp.</b>            | GY6.2  | SpeciesID:6  | MALBAC | 85821217  | 48031928 | 0.04 | 2.51 | 0.60 | 11.00 | 1  |
| <b>Hemicycliostyla franzi</b> | GQ60.1 | SpeciesID:60 | MDA    | 70629143  | 42671118 | 0.05 | 1.67 | 0.54 | 6.00  | 1  |
| <b>Hemicycliostyla franzi</b> | GQ60.2 | SpeciesID:60 | MDA    | 76162318  | 46494052 | 0.03 | 1.33 | 0.43 | 6.00  | 1  |
| <b>Hemicycliostyla franzi</b> | GY60.1 | SpeciesID:60 | MALBAC | 80550661  | 38659681 | 0.01 | 1.80 | 0.49 | 1.00  | 1  |



|                                  |        |              |        |           |           |      |      |      |       |    |
|----------------------------------|--------|--------------|--------|-----------|-----------|------|------|------|-------|----|
| <b>Hemicyclostyla franzi</b>     | GY60.2 | SpeciesID:60 | MALBAC | 96340939  | 49866476  | 0.01 | 2.22 | 0.68 | 3.00  | 1  |
| <b>Campanella umbellaria</b>     | GQ61.1 | SpeciesID:61 | MDA    | 81235978  | 51626222  | 0.03 | 2.17 | 0.55 | 10.00 | 1  |
| <b>Campanella umbellaria</b>     | GQ61.2 | SpeciesID:61 | MDA    | 66804958  | 43296397  | 0.04 | 2.10 | 0.54 | 8.00  | 1  |
| <b>Amphorellopsis sp.</b>        | GQ62.1 | SpeciesID:62 | MDA    | 69607052  | 50957595  | 0.31 | 1.38 | 0.41 | 30.00 | 1  |
| <b>Opercularia sp.</b>           | GQ63.2 | SpeciesID:63 | MDA    | 72055234  | 30383333  | 0.05 | 1.95 | 0.47 | 10.00 | 1  |
| <b>Certesias quadrinucleata</b>  | GQ64.1 | SpeciesID:64 | MDA    | 67934170  | 37264836  | 0.03 | 2.45 | 0.68 | 2.00  | 1  |
| <b>Certesias quadrinucleata</b>  | GQ64.2 | SpeciesID:64 | MDA    | 70335320  | 41129248  | 0.05 | 2.33 | 0.66 | 2.00  | 1  |
| <b>Certesias quadrinucleata</b>  | GY64.1 | SpeciesID:64 | MALBAC | 145805004 | 81751714  | 0.10 | 3.25 | 0.88 | 17.00 | 1  |
| <b>Certesias quadrinucleata</b>  | GY64.3 | SpeciesID:64 | MALBAC | 168459091 | 97073855  | 0.08 | 3.12 | 0.85 | 13.00 | >1 |
| <b>Blepharisma penardi</b>       | GQ65.1 | SpeciesID:65 | MDA    | 81581178  | 11799074  | 0.01 | 2.21 | 0.55 | 0.00  | 1  |
| <b>Blepharisma penardi</b>       | GQ65.2 | SpeciesID:65 | MDA    | 68072282  | 9357063   | 0.01 | 2.08 | 0.52 | 0.00  | 1  |
| <b>Climacostomum virens</b>      | GQ66.2 | SpeciesID:66 | MDA    | 124467288 | 38054079  | 0.04 | 1.45 | 0.54 | 2.00  | 1  |
| <b>Climacostomum virens</b>      | GY66.2 | SpeciesID:66 | MALBAC | 79450657  | 35992602  | 0.03 | 1.75 | 0.64 | 2.00  | 1  |
| <b>Climacostomum virens</b>      | GY66.3 | SpeciesID:66 | MALBAC | 74726455  | 34337773  | 0.06 | 1.66 | 0.69 | 2.00  | >1 |
| <b>Climacostomum virens</b>      | GQ66.3 | SpeciesID:66 | MDA    | 122056665 | 37780800  | 0.05 | 1.50 | 0.55 | 2.00  | >1 |
| <b>Heterometopus palaeformis</b> | GQ67.2 | SpeciesID:67 | MDA    | 89629740  | 84139535  | 0.14 | 0.89 | 0.39 | 2.00  | 1  |
| <b>Heterometopus palaeformis</b> | GQ67.3 | SpeciesID:67 | MDA    | 115354539 | 104529281 | 0.01 | 1.75 | 0.78 | 0.00  | >1 |
| <b>Heterometopus palaeformis</b> | GY67.2 | SpeciesID:67 | MALBAC | 180677530 | 126419828 | 0.28 | 2.41 | 0.76 | 31.00 | 1  |
| <b>Heterometopus palaeformis</b> | GY67.3 | SpeciesID:67 | MALBAC | 166880829 | 95557886  | 0.07 | 3.13 | 0.82 | 25.00 | >1 |
| <b>Schmidingerothrix sp.</b>     | GQ68.1 | SpeciesID:68 | MDA    | 96271658  | 30942240  | 0.00 | 1.63 | 0.62 | 0.00  | 1  |
| <b>Schmidingerothrix sp.</b>     | GY68.2 | SpeciesID:68 | MALBAC | 60552294  | 42546806  | 0.43 | 2.25 | 0.73 | 46.00 | 1  |
| <b>Schmidingerothrix sp.</b>     | GY68.3 | SpeciesID:68 | MALBAC | 65731221  | 43361418  | 0.33 | 2.24 | 0.74 | 24.00 | >1 |
| <b>Schmidingerothrix sp.</b>     | GQ68.2 | SpeciesID:68 | MDA    | 41156491  | 23526584  | 0.01 | 1.96 | 0.57 | 0.00  | 1  |
| <b>Homalogastra sp.</b>          | GQ69.2 | SpeciesID:69 | MDA    | 81222064  | 75901328  | 0.84 | 0.85 | 0.50 | 2.00  | 1  |
| <b>Homalogastra sp.</b>          | GQ69.3 | SpeciesID:69 | MDA    | 63391974  | 60978549  | 0.92 | 1.03 | 0.53 | 7.00  | >1 |
| <b>Homalogastra sp.</b>          | GY69.1 | SpeciesID:69 | MALBAC | 99668559  | 83241606  | 0.67 | 1.90 | 0.74 | 26.00 | 1  |

|                                        |                      |                                                  |        |           |           |      |      |      |       |    |
|----------------------------------------|----------------------|--------------------------------------------------|--------|-----------|-----------|------|------|------|-------|----|
| <b>Homalogastra sp.</b>                | GY69.2               | SpeciesID:69                                     | MALBAC | 82724960  | 66754584  | 0.63 | 1.66 | 0.66 | 29.00 | 1  |
| <b>Euplotes cf. parawoodruffi</b>      | GQ7.2                | SpeciesID:7                                      | MDA    | 77812213  | 68367100  | 0.80 | 1.20 | 0.46 | 13.00 | 1  |
| <b>Euplotes cf. parawoodruffi</b>      | GY7.1                | SpeciesID:7                                      | MALBAC | 71893716  | 50803079  | 0.15 | 1.34 | 0.39 | 24.00 | 1  |
| <b>Euplotes cf. parawoodruffi</b>      | GY7.2                | SpeciesID:7                                      | MALBAC | 79967599  | 53983781  | 0.10 | 1.18 | 0.36 | 20.00 | 1  |
| <b>Limnoholosticha viridis nov.sp.</b> | GQ70.2               | SpeciesID:70                                     | MDA    | 86400185  | 29127780  | 0.02 | 0.81 | 0.28 | 2.00  | 1  |
| <b>Limnoholosticha viridis nov.sp.</b> | GQ70.3               | SpeciesID:70                                     | MDA    | 80242953  | 24761211  | 0.01 | 0.82 | 0.32 | 1.00  | >1 |
| <b>Limnoholosticha viridis nov.sp.</b> | GY70.1               | SpeciesID:70                                     | MALBAC | 68372464  | 25659583  | 0.07 | 1.84 | 0.66 | 8.00  | 1  |
| <b>Limnoholosticha viridis nov.sp.</b> | GY70.2               | SpeciesID:70                                     | MALBAC | 93585901  | 35008054  | 0.07 | 1.78 | 0.64 | 9.00  | 1  |
| <b>Saprodinium sp.</b>                 | GY71.2               | SpeciesID:71                                     | MALBAC | 183784924 | 177662256 | 0.37 | 0.82 | 0.25 | 8.00  | 1  |
| <b>Saprodinium sp.</b>                 | GY71.3               | SpeciesID:71                                     | MALBAC | 203920783 | 196709570 | 0.26 | 1.10 | 0.36 | 6.00  | >1 |
| <b>Spirostomum</b>                     | GQ8.2                | SpeciesID:8_30                                   | MDA    | 103099810 | 36417901  | 0.06 | 1.33 | 0.40 | 3.00  | 1  |
| <b>Spirostomum</b>                     | GY8.1                | SpeciesID:8_30                                   | MALBAC | 68192953  | 36150789  | 0.03 | 2.38 | 0.67 | 2.00  | 1  |
| <b>Spirostomum</b>                     | GY8.2                | SpeciesID:8_30                                   | MALBAC | 83408446  | 46715925  | 0.04 | 2.30 | 0.73 | 6.00  | 1  |
| <b>Spirostomum</b>                     | GQ30.2               | SpeciesID:8_30                                   | MDA    | 89883646  | 44180237  | 0.02 | 2.41 | 0.57 | 0.00  | 1  |
| <b>Spirostomum</b>                     | GQ30.3               | SpeciesID:8_30                                   | MDA    | 85911845  | 41959715  | 0.03 | 2.27 | 0.52 | 0.00  | >1 |
| <b>Spirostomum</b>                     | GY30.2               | SpeciesID:8_30                                   | MALBAC | 89878895  | 49117172  | 0.01 | 2.48 | 0.61 | 0.00  | 1  |
| <b>Spirostomum</b>                     | GY30.3               | SpeciesID:8_30                                   | MALBAC | 83015004  | 44159420  | 0.02 | 2.27 | 0.56 | 0.00  | >1 |
| <b>Urocentrum</b>                      | GQ9.2                | SpeciesID:9                                      | MDA    | 105070477 | 93979190  | 0.45 | 2.09 | 0.61 | 89.00 | 1  |
| <b>Urocentrum</b>                      | GY9.1                | SpeciesID:9                                      | MALBAC | 78794355  | 50522544  | 0.10 | 1.89 | 0.64 | 30.00 | 1  |
| <b>Urocentrum</b>                      | GY9.2                | SpeciesID:9                                      | MALBAC | 79671877  | 58897045  | 0.35 | 1.80 | 0.65 | 48.00 | 1  |
| <b>Anteholosticha monilata</b>         | Anteholosticha_DA1   | SpeciesID:Anteholosticha_DA1                     | MALBAC | 97292532  | 53754319  | 0.02 | 1.93 | 0.51 | 11.00 | 1  |
| <b>Apodileptus visscheri</b>           | Apodileptus          | SpeciesID:Apodileptus                            | MALBAC | 91233498  | 61294717  | 0.16 | 2.57 | 0.61 | 55.00 | 1  |
| <b>Caenomorpha medusula</b>            | Caenomorpha_medusula | SpeciesID:Caenomorpha_medusula                   | MALBAC | 95987284  | 64048137  | 0.10 | 2.34 | 0.52 | 87.00 | 1  |
| <b>Chilodontopsis depressa</b>         | GR1.DNA              | SpeciesID:Chilodontopsis_depressa-DNA_hemolei    | MALBAC | 84167706  | 51861665  | 0.21 | 2.30 | 0.62 | 28.00 | 1  |
| <b>Colpoda variabilis</b>              | MDA17                | SpeciesID:Colpoda_variabilis_LBR2017052001_MDA17 | MDA    | 68422491  | 39783569  | 0.05 | 2.27 | 0.67 | 3.00  | 1  |
| <b>Cothurnia sp.</b>                   | Cothurnia_D13        | SpeciesID:Cothurnia_D13                          | MALBAC | 76714918  | 65816306  | 0.58 | 2.44 | 0.65 | 55.00 | 1  |

|                              |                         |                                               |        |          |          |      |      |      |        |   |
|------------------------------|-------------------------|-----------------------------------------------|--------|----------|----------|------|------|------|--------|---|
| <b>Deviata n. sp.</b>        | Deviata_DD1             | SpeciesID:Deviata_DD1                         | MALBAC | 71210648 | 32662270 | 0.17 | 1.91 | 0.64 | 22.00  | 1 |
| <b>Dexiostoma</b>            | Dexiostoma              | SpeciesID:Dexiostoma                          | MALBAC | 63004201 | 15429400 | 0.01 | 2.03 | 0.61 | 2.00   | 1 |
| <b>Diophrys scutum</b>       | Diophrys_scutum         | SpeciesID:Diophrys_scutum                     | MALBAC | 68909742 | 59846386 | 0.44 | 2.74 | 0.69 | 86.00  | 1 |
| <b>Lacrymaria sp.1</b>       | MDA03                   | SpeciesID:Lacrymaria_BY201703100_MDA03        | MALBAC | 69282285 | 54209162 | 0.39 | 2.61 | 0.69 | 33.00  | 1 |
| <b>Lacrymaria sp.2</b>       | MDA05                   | SpeciesID:Lacrymaria_BY2017031006_MDA05       | MALBAC | 67286759 | 29992943 | 0.05 | 1.89 | 0.61 | 5.00   | 1 |
| <b>Litonotus sp.</b>         | MDA04                   | SpeciesID:Litonotus_BY_MDA04                  | MALBAC | 69067232 | 47354471 | 0.13 | 1.25 | 0.60 | 1.00   | 1 |
| <b>Metopus</b>               | Metopus_D11             | SpeciesID:Metopus_D11                         | MALBAC | 75784839 | 54743038 | 0.26 | 2.24 | 0.52 | 116.00 | 1 |
| <b>Neourostylopsis</b>       | MDA16                   | SpeciesID:Neourostylopsis_ZTY2017032702_MDA16 | MDA    | 66785873 | 49720133 | 0.56 | 0.76 | 0.35 | 3.00   | 1 |
| <b>Omegastrombidium</b>      | MDA02                   | SpeciesID:Omegastrombidium_WR2017031001_MDA02 | MDA    | 67741782 | 39731669 | 0.04 | 2.07 | 0.72 | 7.00   | 1 |
| <b>Phacodinium</b>           | Phacodinium_D15         | SpeciesID:Phacodinium_D15                     | MALBAC | 70223874 | 33247247 | 0.02 | 1.65 | 0.40 | 1.00   | 1 |
| <b>Stenia</b>                | Stenia                  | SpeciesID:Stenia                              |        | 71016540 | 20989674 | 0.03 | 1.83 | 0.49 | 4.00   | 1 |
| <b>Stentor roeselii</b>      | Stentor_DS1             | SpeciesID:Stentor_DS1                         | MALBAC | 88776443 | 24517115 | 0.14 | 1.61 | 0.64 | 15.00  | 1 |
| <b>Strobilidium gyrans</b>   | Strobilidium_gyrans_D12 | SpeciesID:Strobilidium_gyrans_D12             | MALBAC | 87824526 | 71989987 | 0.42 | 2.75 | 0.60 | 90.00  | 1 |
| <b>Trithigmostoma steini</b> | Trithigmostoma          | SpeciesID:Trithigmostoma                      | MALBAC | 56397578 | 26092340 | 0.02 | 2.03 | 0.54 | 4.00   | 1 |
| <b>Uronychia binucleata</b>  | Uronychia_binucleata    | SpeciesID:Uronychia_binucleata                | MALBAC | 59027368 | 32472218 | 0.03 | 2.87 | 0.72 | 5.00   | 1 |

**Table S2. Taxonomic and integrity information of 148 representative single genomic bins.** **saml eName Count** indicates the number of samples assembled for the bin; **RepresentBin ANI** represents the maximum ANI value of the genome as compared to the reference; **RepresentBin refID** indicates the ID of the largest ANI, and **RepresentBin refSpecies** indicates the name of the corresponding species.

| ID | saml eName Count | RepresentBin ANI | RepresentBin refID | RepresentBin refSpecies                          | RepresentBin type | RepresentBin completeness | RepresentBin contamination | RepresentBin GC | RepresentBin N50 | RepresentBin size | CatBatlower    | CatBatlineage phylum                        |
|----|------------------|------------------|--------------------|--------------------------------------------------|-------------------|---------------------------|----------------------------|-----------------|------------------|-------------------|----------------|---------------------------------------------|
| 0  | 3                | 99.0762          | GCF_013374815.1    | Shigella sonnei                                  | Known             | 99.16                     | 0.264                      | 0.507           | 79332            | 4646780           | Proteobacteria | Bacteria (superkingdom): 0.77               |
| 1  | 3                | 82.4365          | GCF_003574485.1    | Facilibium subflavum                             | Novel             | 87.64                     | 0.574                      | 0.333           | 113890           | 1093541           | Proteobacteria | Fastidiosibacteraceae (family): 0.91        |
| 2  | 1                | NA               | NA                 | NA                                               | Novel             | 85.46                     | 2.992                      | 0.391           | 6412             | 2207591           | Bacteroidetes  | Marinifilaceae (family): 0.65               |
| 3  | 1                | 99.4633          | GCF_011684115.1    | Rahnella aceris                                  | Known             | 64.96                     | 0.163                      | 0.518           | 158168           | 2539051           | Proteobacteria | Rahnella (genus): 0.31                      |
| 4  | 3                | NA               | NA                 | NA                                               | Novel             | 87.52                     | 0                          | 0.453           | 9874             | 1950983           | Proteobacteria | Deltaproteobacteria (class): 0.91           |
| 5  | 2                | 81.3974          | GCF_009938305.1    | Fluviibacter phosphoraccumulans                  | Novel             | 91.96                     | 0                          | 0.544           | 79622            | 1563698           | Proteobacteria | unclassified Rhodocyclaceae (no rank): 0.51 |
| 6  | 3                | NA               | NA                 | NA                                               | Novel             | 75.96                     | 4.537                      | 0.355           | 5321             | 979007            | Proteobacteria | Proteobacteria (phylum): 0.34               |
| 7  | 1                | 74.913           | GCF_000287275.1    | Candidatus Carsonella ruddii HC isolate Thao2000 | Novel             | 85.59                     | 0                          | 0.286           | 142931           | 989368            | Firmicutes     | Firmicutes (phylum): 0.38                   |
| 8  | 3                | 80.871           | GCF_009938305.1    | Fluviibacter phosphoraccumulans                  | Novel             | 75                        | 1.724                      | 0.571           | 9706             | 1707186           | Proteobacteria | unclassified Rhodocyclaceae (no rank): 0.54 |
| 9  | 3                | 77.6537          | GCF_003953955.1    | Candidatus Aquarickettsia rohweri                | Novel             | 90.59                     | 0.299                      | 0.31            | 5904             | 853820            | Proteobacteria | Rickettsiales (order): 0.90                 |
| 10 | 6                | 96.4297          | GCF_000376545.2    | Tritonibacter mobilis F1926                      | Known             | 89.31                     | 0.706                      | 0.589           | 25520            | 3929600           | Proteobacteria | Rhodobacteraceae (family): 0.93             |
| 11 | 2                | 79.4572          | GCF_009938305.1    | Fluviibacter phosphoraccumulans                  | Novel             | 89.1                      | 0.676                      | 0.574           | 32685            | 1552936           | Proteobacteria | unclassified Rhodocyclaceae (no rank): 0.53 |

|    |   |         |                 |                                                               |              |       |       |       |        |         |                        |                                                        |
|----|---|---------|-----------------|---------------------------------------------------------------|--------------|-------|-------|-------|--------|---------|------------------------|--------------------------------------------------------|
| 12 | 1 | 96.418  | GCF_008693705.1 | <i>Aeromonas veronii</i>                                      | Known        | 74.13 | 4.31  | 0.589 | 45183  | 4555931 | Proteobacteria         | <i>Aeromonas</i> (genus): 0.71                         |
| 13 | 1 | NA      | NA              | NA                                                            | Novel        | 57.98 | 0.574 | 0.356 | 25889  | 1800648 | Proteobacteria         | Gammaproteobacteria (class): 0.68                      |
| 14 | 1 | 96.9805 | GCF_017310215.1 | <i>Aeromonas hydrophila</i>                                   | Known        | 54.31 | 3.448 | 0.62  | 15220  | 3852457 | Proteobacteria         | <i>Aeromonas</i> (genus): 0.62                         |
| 15 | 1 | 83.2196 | GCF_000009365.1 | <i>Alcanivorax borkumensis</i><br>SK2                         | Intermediate | 97.45 | 0.991 | 0.584 | 85615  | 3565421 | Proteobacteria         | unclassified <i>Alcanivorax</i> (no rank):<br>0.59     |
| 16 | 1 | 95.9023 | GCF_900115865.1 | <i>Donghicola eburneus</i>                                    | Known        | 63.79 | 1.724 | 0.589 | 77543  | 3341043 | Proteobacteria         | <i>Donghicola eburneus</i> (species): 0.66             |
| 17 | 3 | NA      | NA              | NA                                                            | Novel        | 82.9  | 1.424 | 0.474 | 146549 | 4701803 | Terrabacteria<br>group | Cyanobacteria/Melainabacteria<br>group (clade): 0.57   |
| 18 | 1 | 97.226  | GCF_020783375.1 | <i>Pseudomonas chloritidis</i><br><i>mutans</i>               | Known        | 74.12 | 0.862 | 0.624 | 6264   | 2880935 | Proteobacteria         | Gammaproteobacteria (class): 0.53                      |
| 19 | 6 | 94.0335 | GCF_001612705.2 | <i>Pseudomonas yamanorum</i>                                  | Intermediate | 98.05 | 1.017 | 0.609 | 39701  | 7057567 | Proteobacteria         | <i>Pseudomonas</i> (genus): 0.62                       |
| 20 | 1 | 92.6113 | GCF_004000275.1 | <i>Saccharospirillum alexandrii</i>                           | Intermediate | 63.79 | 3.448 | 0.568 | 5692   | 3578215 | Proteobacteria         | <i>Saccharospirillum alexandrii</i><br>(species): 0.43 |
| 21 | 1 | 82.2355 | GCF_002374315.1 | <i>Halomonas nigrificans</i>                                  | Novel        | 55.48 | 0     | 0.55  | 13175  | 1893375 | Proteobacteria         | unclassified <i>Halomonas</i> (no rank):<br>0.39       |
| 22 | 1 | 98.748  | GCF_000422425.1 | <i>Oceanospirillum beijerinckii</i><br>DSM 7166               | Known        | 82.17 | 1.347 | 0.48  | 6174   | 4008970 | Proteobacteria         | <i>Oceanospirillum</i> (genus): 0.93                   |
| 23 | 1 | 96.524  | GCF_001550135.1 | <i>Pseudoalteromonas shioyasakiensis</i>                      | Known        | 51.25 | 0.168 | 0.41  | 100729 | 2424899 | Proteobacteria         | <i>Pseudoalteromonas</i> (genus): 0.52                 |
| 24 | 1 | 98.4738 | GCF_902498775.1 | <i>Marinobacter</i> sp. EC-HK377                              | Known        | 57.75 | 0     | 0.573 | 4884   | 2947476 | Proteobacteria         | <i>Marinobacter</i> (genus): 0.87                      |
| 25 | 3 | NA      | NA              | NA                                                            | Novel        | 95.61 | 0.584 | 0.397 | 35527  | 2070783 | Proteobacteria         | Legionellaceae (family): 0.68                          |
| 26 | 1 | 90.7086 | GCF_000260985.4 | <i>Methylophaga nitratireducens</i><br><i>nitratireducens</i> | Intermediate | 98.76 | 0.544 | 0.448 | 137908 | 2859985 | Proteobacteria         | <i>Methylophaga</i> (genus): 0.79                      |
| 27 | 1 | 78.8244 | GCF_017161445.1 | <i>Niveibacterium microcysteis</i>                            | Novel        | 57.31 | 1.037 | 0.63  | 18905  | 2642738 | Proteobacteria         | <i>Niveibacterium</i> (genus): 0.39                    |
| 28 | 1 | 82.1313 | GCF_011046245.1 | <i>Rhizobium pseudoryzae</i>                                  | Novel        | 55.68 | 0     | 0.606 | 20428  | 4268987 | Proteobacteria         | <i>Rhizobium</i> (genus): 0.45                         |

|    |   |         |                 |                                   |              |       |       |       |        |         |                         |                                             |
|----|---|---------|-----------------|-----------------------------------|--------------|-------|-------|-------|--------|---------|-------------------------|---------------------------------------------|
| 29 | 1 | NA      | NA              | NA                                | Novel        | 56.08 | 1.895 | 0.337 | 60662  | 914206  | Proteobacteria          | Rickettsiaceae bacterium (species):<br>0.46 |
| 31 | 1 | NA      | NA              | NA                                | Novel        | 79.59 | 0.574 | 0.395 | 86709  | 1642861 | Proteobacteria          | Gammaproteobacteria (class): 0.31           |
| 32 | 1 | NA      | NA              | NA                                | Novel        | 89.03 | 2.58  | 0.405 | 21133  | 2010323 | Proteobacteria          | Deltaproteobacteria (class): 0.92           |
| 33 | 1 | 87.6484 | GCF_000168975.1 | Roseibium aggregatum IAM<br>12614 | Intermediate | 60.52 | 0.158 | 0.591 | 5082   | 3929807 | Proteobacteria          | Labrenzia (genus): 0.59                     |
| 34 | 1 | NA      | NA              | NA                                | Novel        | 72.99 | 0     | 0.56  | 8068   | 3125628 | Chloroflexi             | Chloroflexaceae (family): 0.44              |
| 35 | 1 | NA      | NA              | NA                                | Novel        | 91.94 | 2.118 | 0.458 | 66937  | 5784708 | Deinococcus-<br>Thermus | Deinococci (class): 0.42                    |
| 36 | 1 | 77.4228 | GCF_016603745.1 | Francisella philomiragia          | Novel        | 53.59 | 0     | 0.306 | 45776  | 730191  | Proteobacteria          | Francisellaceae (family): 0.70              |
| 37 | 2 | NA      | NA              | NA                                | Novel        | 73.29 | 0.025 | 0.423 | 81526  | 969397  | Proteobacteria          | Proteobacteria (phylum): 0.79               |
| 38 | 1 | 79.536  | GCF_005876985.1 | Rhodoferax bucti                  | Novel        | 62.19 | 4.867 | 0.603 | 5097   | 2836383 | Proteobacteria          | unclassified Rhodoferax (no rank):<br>0.32  |
| 39 | 4 | NA      | NA              | NA                                | Novel        | 97.84 | 0     | 0.417 | 164266 | 2009606 | Proteobacteria          | Alphaproteobacteria (class): 0.43           |
| 41 | 1 | NA      | NA              | NA                                | Novel        | 61.9  | 1.111 | 0.597 | 6061   | 3971911 | Planctomycetes          | Planctomycetes (phylum): 0.74               |
| 42 | 2 | NA      | NA              | NA                                | Novel        | 91.41 | 0.609 | 0.363 | 258535 | 1192914 | Proteobacteria          | Proteobacteria (phylum): 0.34               |
| 43 | 1 | NA      | NA              | NA                                | Novel        | 62.35 | 0     | 0.422 | 31615  | 1434861 | Proteobacteria          | Gammaproteobacteria (class): 0.39           |
| 44 | 1 | NA      | NA              | NA                                | Novel        | 71.15 | 0.581 | 0.397 | 31732  | 1518459 | unknow                  | Bacteria (superkingdom): 0.92               |
| 45 | 1 | 81.4855 | GCF_004361915.1 | Sediminibacterium<br>goheungense  | Novel        | 90.51 | 0     | 0.406 | 12327  | 3452221 | Bacteroidetes           | Chitinophagaceae (family): 0.88             |
| 46 | 1 | NA      | NA              | NA                                | Novel        | 60.52 | 0.68  | 0.517 | 10443  | 2897054 | Verrucomicrobi<br>a     | Verrucomicrobiales (order): 0.49            |
| 47 | 1 | NA      | NA              | NA                                | Novel        | 52.94 | 0     | 0.365 | 40276  | 902203  | Bacteroidetes           | Bacteroidetes (phylum): 0.39                |
| 48 | 1 | NA      | NA              | NA                                | Novel        | 76.14 | 0.71  | 0.338 | 45593  | 863405  | Proteobacteria          | Rickettsiales bacterium (species):<br>0.33  |

|    |   |         |                 |                                                  |              |       |       |       |        |         |                |                                           |
|----|---|---------|-----------------|--------------------------------------------------|--------------|-------|-------|-------|--------|---------|----------------|-------------------------------------------|
| 49 | 2 | 98.6471 | GCF_003003005.1 | Mongoliibacter ruber                             | Known        | 99.24 | 0.02  | 0.392 | 90653  | 4754913 | Bacteroidetes  | Cyclobacteriaceae (family): 0.97          |
| 50 | 1 | NA      | NA              | NA                                               | Novel        | 92.98 | 0.609 | 0.38  | 173655 | 1252669 | Proteobacteria | Proteobacteria (phylum): 0.33             |
| 51 | 1 | 98.5092 | GCF_003815615.1 | Chryseobacterium shandongense                    | Known        | 92.89 | 0     | 0.368 | 105846 | 3519886 | Bacteroidetes  | Weeksellaceae (family): 0.66              |
| 52 | 2 | NA      | NA              | NA                                               | Novel        | 94.01 | 4.32  | 0.409 | 38556  | 4473337 | Acidobacteria  | Acidobacteria (phylum): 0.80              |
| 53 | 1 | NA      | NA              | NA                                               | Novel        | 57.77 | 0     | 0.341 | 39513  | 2173177 | Lentisphaerae  | Lentisphaerae (phylum): 0.49              |
| 54 | 1 | NA      | NA              | NA                                               | Novel        | 93.16 | 0.427 | 0.472 | 158130 | 2046809 | Proteobacteria | Betaproteobacteria (class): 0.57          |
| 55 | 2 | 82.5958 | GCF_014641715.1 | Polaromonas eurypsychrophila                     | Novel        | 96.1  | 0     | 0.627 | 104730 | 3426239 | Proteobacteria | unclassified Polaromonas (no rank): 0.30  |
| 56 | 1 | NA      | NA              | NA                                               | Novel        | 92.9  | 1.29  | 0.519 | 190291 | 3142114 | Proteobacteria | Syntrophorhabdus (genus): 0.34            |
| 57 | 2 | 74.8251 | GCF_000287275.1 | Candidatus Carsonella ruddii HC isolate Thao2000 | Novel        | 63.38 | 0     | 0.285 | 21555  | 1220372 | Proteobacteria | Deltaproteobacteria (class): 0.37         |
| 58 | 1 | NA      | NA              | NA                                               | Novel        | 57.85 | 2.8   | 0.625 | 9646   | 2949169 | Spirochaetes   | Spirochaetales bacterium (species): 0.38  |
| 59 | 2 | 75.2362 | GCF_000287275.1 | Candidatus Carsonella ruddii HC isolate Thao2000 | Novel        | 95.4  | 0.8   | 0.292 | 130741 | 3222431 | Spirochaetes   | unclassified Spirochaetes (no rank): 0.58 |
| 60 | 1 | 81.3506 | GCF_000260135.1 | Thiothrix nivea DSM 5205                         | Novel        | 93.52 | 1.494 | 0.548 | 30374  | 4474577 | Proteobacteria | Thiothrix (genus): 0.90                   |
| 61 | 1 | 97.7677 | GCF_900102315.1 | Celeribacter baekdonensis                        | Known        | 83.76 | 1.01  | 0.579 | 7253   | 3097660 | Proteobacteria | Rhodobacteraceae (family): 0.99           |
| 62 | 4 | NA      | NA              | NA                                               | Novel        | 81.53 | 0     | 0.585 | 9761   | 4519323 | Planctomycetes | Planctomycetes (phylum): 0.78             |
| 63 | 1 | NA      | NA              | NA                                               | Novel        | 50.18 | 2.247 | 0.554 | 4102   | 3443374 | Planctomycetes | Planctomycetaceae (family): 0.38          |
| 64 | 1 | NA      | NA              | NA                                               | Novel        | 87.09 | 1.29  | 0.548 | 47449  | 1545942 | Proteobacteria | Deltaproteobacteria (class): 0.40         |
| 65 | 1 | NA      | NA              | NA                                               | Novel        | 91.02 | 0.675 | 0.426 | 20008  | 2022771 | Chlamydiae     | Chlamydiai (class): 0.62                  |
| 67 | 1 | 82.791  | GCF_001551835.1 | Dechloromonas denitrificans                      | Novel        | 72.41 | 0     | 0.626 | 11543  | 1841885 | Proteobacteria | Betaproteobacteria (class): 0.72          |
| 68 | 2 | 89.484  | GCF_003336675.1 | Halomonas montanilacus                           | Intermediate | 89.62 | 0.646 | 0.626 | 20347  | 3506634 | Proteobacteria | Halomonas (genus): 0.94                   |
| 69 | 1 | NA      | NA              | NA                                               | Novel        | 60.35 | 0.66  | 0.399 | 5648   | 3807487 | Bacteroidetes  | Bacteroidetes (phylum): 0.73              |

|    |   |         |                 |                                          |              |       |       |       |        |         |                 |                                             |
|----|---|---------|-----------------|------------------------------------------|--------------|-------|-------|-------|--------|---------|-----------------|---------------------------------------------|
| 70 | 2 | 84.4868 | GCF_001595965.1 | Polynucleobacter yangtzensis             | Intermediate | 93.26 | 0.233 | 0.452 | 100129 | 1618439 | Proteobacteria  | Polynucleobacter (genus): 0.57              |
| 71 | 1 | NA      | NA              | NA                                       | Novel        | 62.04 | 0.055 | 0.383 | 46172  | 1467705 | Bacteroidetes   | Flavobacteriales (order): 0.32              |
| 72 | 1 | 89.3543 | GCF_012927165.1 | Zoogloea dura                            | Intermediate | 59.48 | 0     | 0.659 | 7846   | 2490521 | Proteobacteria  | unclassified Zoogloea (no rank):<br>0.74    |
| 73 | 1 | NA      | NA              | NA                                       | Novel        | 56.12 | 0     | 0.443 | 208112 | 2279844 | Proteobacteria  | Oligoflexales bacterium* (species):<br>0.61 |
| 74 | 1 | 95.9686 | GCF_014641635.1 | Aquaticitalea lipolytica                 | Known        | 89.39 | 4.794 | 0.315 | 7369   | 3764181 | Bacteroidetes   | Flavobacteriaceae (family): 0.84            |
| 75 | 2 | NA      | NA              | NA                                       | Novel        | 95.12 | 0.731 | 0.332 | 33908  | 2061220 | Proteobacteria  | Neisseriales (order): 0.55                  |
| 76 | 2 | 99.5275 | GCF_000376705.1 | Cutibacterium acnes<br>HL096PA1          | Known        | 89.03 | 2.302 | 0.603 | 10665  | 2309482 | Actinobacteria  | Actinobacteria (class): 0.91                |
| 77 | 2 | NA      | NA              | NA                                       | Novel        | 64.11 | 1.428 | 0.397 | 6616   | 2213875 | Bacteroidetes   | Bacteroidetes bacterium (species):<br>0.37  |
| 78 | 2 | 78.2931 | GCF_014644295.1 | Emticicia aquatilis                      | Novel        | 91.25 | 0.744 | 0.383 | 18899  | 5620909 | Bacteroidetes   | Cytophagaceae (family): 0.74                |
| 79 | 1 | NA      | NA              | NA                                       | Novel        | 73.22 | 1.02  | 0.574 | 11986  | 4129647 | Verrucomicrobia | Verrucomicrobiales (order): 0.40            |
| 80 | 2 | 84.9978 | GCF_001571225.1 | Hydrogenophaga palleronii<br>NBRC 102513 | Intermediate | 98.98 | 0.934 | 0.662 | 27792  | 3788203 | Proteobacteria  | Comamonadaceae (family): 0.48               |
| 81 | 1 | 94.2838 | GCF_003326475.1 | Thalassospira xianhensis<br>MCCC 1A02616 | Intermediate | 88.69 | 0.497 | 0.55  | 28682  | 4152117 | Proteobacteria  | Thalassospira (genus): 0.92                 |
| 82 | 1 | NA      | NA              | NA                                       | Novel        | 62.08 | 3.933 | 0.563 | 5586   | 6388512 | Planctomycetes  | Planctomycetes (phylum): 0.65               |
| 83 | 2 | 79.5349 | GCF_001870675.1 | Roseinatronobacter<br>thiooxidans        | Novel        | 92.26 | 1.01  | 0.594 | 20543  | 3430232 | Proteobacteria  | Rhodobacteraceae (family): 0.63             |
| 84 | 1 | 84.9685 | GCF_014204325.1 | Arcicella rosea                          | Intermediate | 57.78 | 0.454 | 0.351 | 18222  | 2818442 | Bacteroidetes   | Cytophagaceae (family): 0.80                |
| 85 | 1 | 86.3079 | GCF_005871185.1 | Limnobacter alexandrii                   | Intermediate | 79.31 | 0     | 0.525 | 96558  | 3052245 | Proteobacteria  | Betaproteobacteria (class): 0.92            |
| 86 | 1 | NA      | NA              | NA                                       | Novel        | 58.18 | 0     | 0.472 | 12994  | 2509942 | Bacteroidetes   | Cytophagales (order): 0.52                  |



|     |   |         |                 |                                                                |              |       |       |       |        |         |                             |                                                             |
|-----|---|---------|-----------------|----------------------------------------------------------------|--------------|-------|-------|-------|--------|---------|-----------------------------|-------------------------------------------------------------|
| 87  | 3 | NA      | NA              | NA                                                             | Novel        | 87.93 | 0.33  | 0.486 | 8741   | 5565693 | Bacteroidetes               | Bacteroidetes (phylum): 0.61                                |
| 88  | 1 | NA      | NA              | NA                                                             | Novel        | 57.68 | 0     | 0.331 | 73692  | 562165  | Proteobacteria              | Alphaproteobacteria (class): 0.49                           |
| 89  | 1 | NA      | NA              | NA                                                             | Novel        | 94.64 | 0.218 | 0.374 | 20264  | 4094229 | Cyanobacteria               | Oscillatoriales (order): 0.31                               |
| 90  | 1 | 86.376  | GCF_003346815.1 | Halarcobacter bivalviorum                                      | Intermediate | 96.74 | 2.168 | 0.289 | 130597 | 2534916 | Proteobacteria              | Arcobacter group (no rank): 0.55                            |
| 91  | 1 | 98.9382 | GCF_900108915.1 | Pseudospirillum japonicum                                      | Known        | 58.62 | 0     | 0.454 | 41330  | 2052818 | Proteobacteria              | Pseudospirillum japonicum*<br>(species): 0.95               |
| 92  | 1 | 88.8597 | GCF_000473205.1 | Pseudophaeobacter arcticus<br>DSM 23566                        | Intermediate | 59.4  | 4.933 | 0.577 | 4882   | 3666524 | Proteobacteria              | Rhodobacteraceae (family): 0.88                             |
| 93  | 1 | 78.6798 | GCF_014203095.1 | Prostheco bacter vanneervenii                                  | Novel        | 66.23 | 0     | 0.613 | 9909   | 4254402 | Verrucomicrobi<br>a         | unclassified Verrucomicrobiaceae<br>(no rank): 0.34         |
| 94  | 2 | 77.3511 | GCF_913698045.1 | Candidatus Megaira<br>endosymbiont of Carteria<br>cerasiformis | Novel        | 98.57 | 2.132 | 0.333 | 51924  | 1292482 | Proteobacteria              | Alphaproteobacteria bacterium<br>(species): 0.72            |
| 95  | 2 | 77.2785 | GCF_000953135.1 | Legionella fallonii LLAP-10                                    | Novel        | 81.1  | 0.381 | 0.385 | 57579  | 1921550 | Proteobacteria              | Legionella (genus): 0.64                                    |
| 96  | 1 | 83.275  | GCF_003172875.1 | Leucothrix pacifica                                            | Intermediate | 90.52 | 3.534 | 0.454 | 15605  | 4729698 | Proteobacteria              | Leucothrix pacifica (species): 0.64                         |
| 149 | 5 | NA      | NA              | NA                                                             | Novel        | 58.71 | 0     | 0.393 | 7474   | 942112  | Firmicutes                  | Negativicutes (class): 0.42                                 |
| 98  | 1 | NA      | NA              | NA                                                             | Novel        | 95.4  | 0.287 | 0.367 | 10157  | 1983086 | Proteobacteria              | Fastidiosibacteraceae (family): 0.86                        |
| 99  | 1 | 78.2555 | GCF_001458735.1 | Candidatus Nitrospira nitrosa                                  | Novel        | 91.36 | 2.777 | 0.546 | 79469  | 4335946 | Nitrospirae                 | Nitrospira (genus): 0.65                                    |
| 100 | 1 | NA      | NA              | NA                                                             | Novel        | 65.1  | 0.102 | 0.391 | 5226   | 1370881 | Elusimicrobia               | unclassified Elusimicrobia (no<br>rank): 0.50               |
| 101 | 1 | NA      | NA              | NA                                                             | Novel        | 74.61 | 0.434 | 0.416 | 16239  | 1429386 | Proteobacteria              | Caedimonas varicaedens* (species):<br>0.92                  |
| 102 | 1 | NA      | NA              | NA                                                             | Novel        | 69.37 | 1.123 | 0.29  | 128439 | 979498  | Bacteria<br>candidate phyla | unclassified Candidatus<br>Gracilibacteria* (no rank): 0.82 |
| 103 | 1 | 78.4705 | GCF_008806775.1 | Flavobacterium luteum                                          | Novel        | 98.93 | 0     | 0.337 | 138280 | 2365250 | Bacteroidetes               | Flavobacteriaceae (family): 0.39                            |

|     |   |         |                 |                                                          |       |       |       |       |        |         |                     |                                               |
|-----|---|---------|-----------------|----------------------------------------------------------|-------|-------|-------|-------|--------|---------|---------------------|-----------------------------------------------|
| 104 | 1 | NA      | NA              | NA                                                       | Novel | 78.6  | 0.188 | 0.505 | 10293  | 3731267 | Chloroflexi         | Chloroflexaceae (family): 0.42                |
| 105 | 2 | 77.3349 | GCF_003953955.1 | Candidatus Aquarickettsia rohweri                        | Novel | 62.63 | 0     | 0.306 | 12110  | 713251  | Proteobacteria      | Rickettsiales (order): 0.91                   |
| 106 | 1 | NA      | NA              | NA                                                       | Novel | 54.02 | 0.561 | 0.326 | 6984   | 779613  | unknow              | Bacteria (superkingdom): 0.87                 |
| 118 | 9 | NA      | NA              | NA                                                       | Novel | 91.61 | 0.806 | 0.52  | 73084  | 2947975 | Proteobacteria      | Syntrophorhabdus (genus): 0.34                |
| 108 | 1 | 78.4705 | GCF_009708035.1 | Hyphomicrobium album                                     | Novel | 52.02 | 0     | 0.636 | 24953  | 1750156 | Proteobacteria      | Hyphomicrobium (genus): 0.41                  |
| 109 | 1 | NA      | NA              | NA                                                       | Novel | 55.17 | 0     | 0.385 | 52097  | 1845200 | Lentisphaerae       | Lentisphaerae (phylum): 0.81                  |
| 110 | 1 | NA      | NA              | NA                                                       | Novel | 64.66 | 0     | 0.352 | 482068 | 724399  | Firmicutes          | Firmicutes (phylum): 0.69                     |
| 111 | 1 | 98.7906 | GCF_913698045.1 | Candidatus Megaira endosymbiont of Carteria cerasiformis | Known | 67.77 | 0.473 | 0.335 | 10863  | 760001  | Proteobacteria      | Alphaproteobacteria bacterium (species): 0.92 |
| 112 | 1 | NA      | NA              | NA                                                       | Novel | 51.92 | 0.142 | 0.358 | 6052   | 1473954 | Proteobacteria      | Proteobacteria (phylum): 0.95                 |
| 113 | 1 | NA      | NA              | NA                                                       | Novel | 75.27 | 0.473 | 0.353 | 60735  | 910530  | Proteobacteria      | Rickettsiales (order): 0.40                   |
| 114 | 1 | NA      | NA              | NA                                                       | Novel | 83.05 | 0     | 0.361 | 194990 | 773296  | Proteobacteria      | Alphaproteobacteria (class): 0.57             |
| 115 | 1 | NA      | NA              | NA                                                       | Novel | 71.31 | 0.707 | 0.482 | 6805   | 3254380 | Cyanobacteria       | Aphanocapsa (genus): 0.36                     |
| 116 | 1 | NA      | NA              | NA                                                       | Novel | 61.78 | 0.574 | 0.352 | 68819  | 1909262 | Proteobacteria      | Gammaproteobacteria (class): 0.68             |
| 117 | 1 | NA      | NA              | NA                                                       | Novel | 67.34 | 0     | 0.406 | 50564  | 1377465 | Proteobacteria      | Gammaproteobacteria (class): 0.51             |
| 119 | 2 | NA      | NA              | NA                                                       | Novel | 70.94 | 2.027 | 0.471 | 82338  | 2386472 | Verrucomicrobia     | Verrucomicrobia (phylum): 0.32                |
| 120 | 1 | NA      | NA              | NA                                                       | Novel | 56.15 | 1.013 | 0.461 | 9814   | 2184282 | Lentisphaerae       | Lentisphaerae (phylum): 0.39                  |
| 121 | 1 | NA      | NA              | NA                                                       | Novel | 52.35 | 2.702 | 0.386 | 9651   | 1853870 | Lentisphaerae       | Lentisphaerae (phylum): 0.84                  |
| 122 | 1 | NA      | NA              | NA                                                       | Novel | 81.35 | 0.141 | 0.475 | 82768  | 2431880 | Deinococcus-Thermus | Deinococcus (genus): 0.59                     |
| 123 | 1 | NA      | NA              | NA                                                       | Novel | 81.03 | 1.149 | 0.378 | 35902  | 1418798 | Proteobacteria      | Fastidiosibacteraceae (family): 0.76          |

|     |   |         |                 |                                                     |       |       |       |       |        |         |                             |                                                         |
|-----|---|---------|-----------------|-----------------------------------------------------|-------|-------|-------|-------|--------|---------|-----------------------------|---------------------------------------------------------|
| 124 | 1 | NA      | NA              | NA                                                  | Novel | 75.47 | 1.149 | 0.382 | 6826   | 1250224 | Proteobacteria              | unclassified Gammaproteobacteria<br>(no rank): 0.31     |
| 125 | 2 | 78.7833 | GCF_002837135.1 | Macromonas bipunctata                               | Novel | 95.64 | 0.146 | 0.577 | 25907  | 2098693 | Proteobacteria              | Burkholderiales (order): 0.57                           |
| 126 | 1 | NA      | NA              | NA                                                  | Novel | 53.06 | 0     | 0.526 | 195184 | 1259507 | Proteobacteria              | Syntrophus (genus): 0.58                                |
| 128 | 1 | NA      | NA              | NA                                                  | Novel | 51.61 | 0     | 0.325 | 36673  | 1700815 | Bacteroidetes               | Bacteroidetes (phylum): 0.46                            |
| 129 | 1 | NA      | NA              | NA                                                  | Novel | 81.18 | 1.184 | 0.541 | 22405  | 2265026 | Proteobacteria              | Alcaligenaceae (family): 0.39                           |
| 130 | 1 | NA      | NA              | NA                                                  | Novel | 55.89 | 0.474 | 0.39  | 591098 | 875040  | Bacteria<br>candidate phyla | unclassified Candidatus<br>Dependentiae (no rank): 0.53 |
| 131 | 1 | 74.9511 | GCF_000287275.1 | Candidatus Carsonella ruddii<br>HC isolate Thao2000 | Novel | 71.42 | 0     | 0.285 | 62147  | 845194  | Proteobacteria              | Alphaproteobacteria (class): 0.57                       |
| 132 | 1 | NA      | NA              | NA                                                  | Novel | 83.37 | 0     | 0.419 | 43559  | 1640564 | Proteobacteria              | Proteobacteria (phylum): 0.31                           |
| 133 | 1 | NA      | NA              | NA                                                  | Novel | 51.3  | 3.225 | 0.418 | 5022   | 1988993 | Bacteroidetes               | Bacteroidetes (phylum): 0.45                            |
| 134 | 3 | NA      | NA              | NA                                                  | Novel | 65.65 | 1.524 | 0.41  | 11877  | 884418  | Proteobacteria              | Proteobacteria (phylum): 0.42                           |
| 135 | 1 | NA      | NA              | NA                                                  | Novel | 74.24 | 2.777 | 0.34  | 14388  | 4399041 | Spirochaetes                | Leptospiraceae* (family): 0.42                          |
| 136 | 1 | NA      | NA              | NA                                                  | Novel | 65.69 | 0     | 0.392 | 75160  | 890008  | Proteobacteria              | Legionellales bacterium (species):<br>0.80              |
| 138 | 1 | NA      | NA              | NA                                                  | Novel | 57.12 | 0     | 0.305 | 106207 | 1006444 | Bacteroidetes               | Bacteroidetes (phylum): 0.38                            |
| 139 | 1 | NA      | NA              | NA                                                  | Novel | 93.58 | 0     | 0.453 | 56581  | 1886901 | Chlamydiae                  | Simkaniaceae (family): 0.62                             |
| 140 | 1 | NA      | NA              | NA                                                  | Novel | 82.26 | 1.036 | 0.362 | 35599  | 1134377 | Proteobacteria              | Proteobacteria (phylum): 0.34                           |
| 141 | 1 | NA      | NA              | NA                                                  | Novel | 56.93 | 0     | 0.348 | 74054  | 914031  | Bacteria<br>candidate phyla | Microgenomates group (clade): 0.42                      |
| 142 | 1 | NA      | NA              | NA                                                  | Novel | 59.64 | 0     | 0.346 | 10445  | 722730  | Proteobacteria              | Rickettsiales (order): 0.62                             |
| 144 | 2 | NA      | NA              | NA                                                  | Novel | 70.44 | 0     | 0.282 | 296010 | 495358  | Proteobacteria              | Proteobacteria (phylum): 0.32                           |

|     |   |         |                 |                                                                          |       |       |       |       |        |         |                     |                                              |
|-----|---|---------|-----------------|--------------------------------------------------------------------------|-------|-------|-------|-------|--------|---------|---------------------|----------------------------------------------|
| 145 | 2 | 75.43   | GCF_018200315.1 | Bacteroidetes bacterium<br>endosymbiont of<br>Orzyaepphilus surinamensis | Novel | 76.89 | 0.675 | 0.234 | 126113 | 598932  | Lentisphaerae       | Lentisphaerae (phylum): 0.69                 |
| 146 | 1 | 78.1963 | GCF_000237205.1 | Simkania negevensis Z                                                    | Novel | 90.2  | 0.94  | 0.409 | 6236   | 1728168 | Chlamydiae          | Simkania (genus): 0.92                       |
| 147 | 1 | NA      | NA              | NA                                                                       | Novel | 99.08 | 0.067 | 0.504 | 112990 | 2256896 | Proteobacteria      | Betaproteobacteria (class): 0.47             |
| 148 | 2 | NA      | NA              | NA                                                                       | Novel | 92.73 | 0.581 | 0.394 | 114593 | 1591792 | Proteobacteria      | Gammaproteobacteria (class): 0.37            |
| 150 | 1 | 75.8569 | GCF_012570365.1 | Enterobacteriaceae<br>endosymbiont of Donacia<br>clavipes                | Novel | 72.16 | 0     | 0.233 | 284225 | 286186  | Proteobacteria      | Rickettsiales (order): 0.63                  |
| 151 | 2 | NA      | NA              | NA                                                                       | Novel | 81.91 | 0.843 | 0.403 | 150919 | 1608356 | Firmicutes          | Firmicutes (phylum): 0.42                    |
| 152 | 1 | NA      | NA              | NA                                                                       | Novel | 55.89 | 0.947 | 0.299 | 29801  | 656349  | Proteobacteria      | Rickettsiales (order): 0.35                  |
| 153 | 1 | NA      | NA              | NA                                                                       | Novel | 72.5  | 0     | 0.311 | 316216 | 632246  | Proteobacteria      | Proteobacteria (phylum): 0.35                |
| 107 | 1 | NA      | NA              | NA                                                                       | Novel | 51.65 | 0.675 | 0.435 | 37556  | 867124  | Verrucomicrobi<br>a | Verrucomicrobia bacterium<br>(species): 0.57 |

**Table S3. The host information of the known symbiont and cyanobacteria.**

| full_name                                                                                                                                                                 | maxAbundance | SummaryHost                                                                                                                                                          | IsCyanobacteria | Obligate symbiont | literature_details                                                                                                                                        |
|---------------------------------------------------------------------------------------------------------------------------------------------------------------------------|--------------|----------------------------------------------------------------------------------------------------------------------------------------------------------------------|-----------------|-------------------|-----------------------------------------------------------------------------------------------------------------------------------------------------------|
| <b>k__Bacteria;p__Proteobacteria;c__Gammaproteobacteria;o__Chromatiales;f__Chromatiaceae;g__Thiodictyon;s__Candidatus Thiodictyon syntrophicum</b>                        | 10742.7      | Metopus sp. (n=1/1)                                                                                                                                                  | No              | Yes               | A microbial eukaryote with a unique combination of purple bacteria and green algae as endosymbionts                                                       |
| <b>k__Bacteria;p__Cyanobacteria;c__o__Chroococcales;f__Microcystaceae;g__Microcystis;s__Microcystis aeruginosa</b>                                                        | 1.00E+06     | Aspidisca leptaspis (n=1/4); Certesia quadrinucleata (n=2/4); Diophrys sp. (n=2/3); Euplotes sp. (n=3/4); Hemicycliostyla franzi (n=1/4); Uronychia setigera (n=2/4) | Yes             | Yes               | A new pentaplex-nested PCR to detect five pathogenic bacteria in free living amoebae                                                                      |
| <b>k__Bacteria;p__Candidatus Neelsonbacteria;c__o__f__g__s__Candidatus Neelsonbacteria bacterium</b>                                                                      | 1416.1       | Urocentrum sp. (n=1/3)                                                                                                                                               | No              | Yes               | Anaerobic endosymbiont generates energy for ciliate host by denitrification                                                                               |
| <b>k__Bacteria;p__Candidatus Poribacteria;c__o__f__g__s__Candidatus Poribacteria bacterium</b>                                                                            | 3119.5       | Strombidinopsis sp. (n=1/3); Urocentrum sp. (n=1/3)                                                                                                                  | No              | Yes               | Bacteria Isolated From the Antarctic Sponge Iophon sp. Reveals Mechanisms of Symbiosis in Sporosarcina, Cellulophaga, and Nesterenkonia                   |
| <b>k__Bacteria;p__Proteobacteria;c__Gammaproteobacteria;o__Legionellales;f__Coxiellaceae;g__Rickettsiella;s__Candidatus Rickettsiella isopodorum</b>                      | 48945.8      | Apodileptus visscheri (n=1/1); Coleps sp. (n=3/4); Loxodes sp. (n=2/3); Metopus sp. (n=1/1)                                                                          | No              | Yes               | Candidate pathogenicity islands in the genome of Candidatus Rickettsiella isopodorum, an intracellular bacterium infecting terrestrial isopod crustaceans |
| <b>k__Bacteria;p__Proteobacteria;c__Alphaproteobacteria;o__Holo Sporales;f__Candidatus Paracaedibacteraceae;g__Candidatus Finniella;s__Candidatus Finniella inopinata</b> | 994891.6     | Brachonella sp. (n=1/4); Coleps sp. (n=1/4); Hemicycliostyla franzi (n=4/4); Loxodes sp. (n=1/3)                                                                     | No              | Yes               | Candidatus Finniella (Rickettsiales, Alphaproteobacteria), Novel Endosymbionts of Viridiraptorid Amoeboflagellates (Cercozoa, Rhizaria)                   |

|                                                                                                                                                                           |          |                                                                                                                                              |    |     |                                                                                                                                                   |
|---------------------------------------------------------------------------------------------------------------------------------------------------------------------------|----------|----------------------------------------------------------------------------------------------------------------------------------------------|----|-----|---------------------------------------------------------------------------------------------------------------------------------------------------|
| k__Bacteria;p__Proteobacteria;c__Alphaproteobacteria;o__Rickettsiales;f__Rickettsiaceae;g__Candidatus Megaira;s__Candidatus Megaira endosymbiont of Carteria cerasiformis | 864799.7 | Colpoda variabilis (n=1/1); Euplotes woodruffi (n=4/4); Neourostylopsis sp. (n=1/1); Stentor roeselii (n=1/1); Tachysoma pellationum (n=1/4) | No | Yes | Candidatus Megaira polyxenophila gen. nov., sp. nov.: Considerations on Evolutionary History, Host Range and Shift of Early Divergent Rickettsiae |
| k__Bacteria;p__Chlamydiae;c__Chlamydia;o__Parachlamydiales;f__Parachlamydiaceae;g__Candidatus Protochlamydia;s__Candidatus Protochlamydia naegleriophila                  | 1951.5   | Epistylis sp. (n=1/2)                                                                                                                        | No | Yes | Candidatus Protochlamydia amoebophila, an endosymbiont of Acanthamoeba spp                                                                        |
| k__Bacteria;p__Proteobacteria;c__Gammaproteobacteria;o__Thiotrichales;f__Francisellaceae;g__Francisella;s__Francisella adeliensis                                         | 1.00E+06 | Kiitricha marina (n=1/3)                                                                                                                     | No | Yes | Detection of a Novel Subspecies of Francisella noatunensis as Endosymbiont of the Ciliate Euplotes raikovi                                        |
| k__Bacteria;p__Proteobacteria;c__Gammaproteobacteria;o__Thiotrichales;f__Francisellaceae;g__Francisella;s__Francisella sp.                                                | 70449.9  | Kiitricha marina (n=1/3); Tintinnopsis radix (n=1/3)                                                                                         | No | Yes | Detection of a Novel Subspecies of Francisella noatunensis as Endosymbiont of the Ciliate Euplotes raikovi                                        |
| k__Bacteria;p__Proteobacteria;c__Gammaproteobacteria;o__Thiotrichales;f__Francisellaceae;g__Francisella;s__Francisella sp. FSC1006                                        | 63350.9  | Chlamydon bourlandi (n=1/4)                                                                                                                  | No | Yes | Detection of a Novel Subspecies of Francisella noatunensis as Endosymbiont of the Ciliate Euplotes raikovi                                        |
| k__Bacteria;p__Proteobacteria;c__Gammaproteobacteria;o__Thiotrichales;f__Francisellaceae;g__Francisella;s__Francisella uliginis                                           | 8564.3   | Lienophora lyngbycola (n=1/4)                                                                                                                | No | Yes | Detection of a Novel Subspecies of Francisella noatunensis as Endosymbiont of the Ciliate Euplotes raikovi                                        |
| k__Bacteria;p__Proteobacteria;c__Epsilonproteobacteria;o__Campylobacteriales;f__Arcobacteraceae;g__Arcobacter;s__Arcobacter sp.                                           | 3960.1   | Diophrys scutum (n=1/1)                                                                                                                      | No | Yes | Environmental Breviatea harbour mutualistic Arco_x0002_bacter epibionts.                                                                          |
| k__Bacteria;p__Proteobacteria;c__Betaproteobacteria;o__Burkholderiales;f__Comamonadaceae;g__Candidatus Symbiobacter;s__Candidatus Symbiobacter mobilis                    | 8995.5   | Spirostomum sp. (n=1/7)                                                                                                                      | No | Yes | Genomic analysis reveals key aspects of prokaryotic symbiosis in the phototrophic consortium Chlorochromatium aggregatum                          |

|                                                                                                                                                                                   |          |                                                                                                                          |    |     |                                                                                                                                                                       |
|-----------------------------------------------------------------------------------------------------------------------------------------------------------------------------------|----------|--------------------------------------------------------------------------------------------------------------------------|----|-----|-----------------------------------------------------------------------------------------------------------------------------------------------------------------------|
| k__Bacteria;p__Proteobacteria;c__Alphaproteobacteria;o__H<br>olosporales;f__Caedimonadaceae;g__Caedimonas;s__Caedim<br>onas varicaedens                                           | 694624.6 | Climacostomum virens (n=4/4); Coleps sp. (n=1/4); Spirostomum sp.<br>(n=3/7)                                             | No | Yes | Holosporales                                                                                                                                                          |
| k__Bacteria;p__Proteobacteria;c__Alphaproteobacteria;o__H<br>olosporales;f__Candidatus<br>Paracaedibacteraceae;g__s__Candidatus<br>Paracaedibacteraceae bacterium 'Lake Konstanz' | 190586.1 | Anteholosticha monilata (n=1/1); Euplotes cf. parawoodruffi (n=1/3);<br>Euplotes woodruffi (n=1/4); Urostyla sp. (n=1/4) | No | Yes | Holosporales                                                                                                                                                          |
| k__Bacteria;p__Proteobacteria;c__Alphaproteobacteria;o__R<br>hodospirillales;f__Rhodospirillaceae;g__Candidatus<br>Endolissoclinum;s__Candidatus Endolissoclinum sp.<br>TMED37    | 8781.6   | Amphorellopsis sp. (n=1/1); Eutintinnus sp. (n=1/3); Strombidinopsis<br>sp. (n=1/3)                                      | No | Yes | Host Control of Symbiont Natural Product Chemistry in Cryptic<br>Populations of the Tunicate Lissoclinum patella                                                      |
| k__Bacteria;p__Proteobacteria;c__Alphaproteobacteria;o__H<br>yphomicrobiales;f__Devosiaceae;g__Devosia;s__Devosia sp.<br>I507                                                     | 319940.1 | Euplotes cf. parawoodruffi (n=1/3); Pleuronema sp. (n=2/3)                                                               | No | Yes | Identification of the bacterial endosymbionts of the marine ciliate<br>Euplotes magnicirratu (Ciliophora, Hypotrichia) and proposal of<br>Candidatus Devosia euplotis |
| k__Bacteria;p__Proteobacteria;c__Gammaproteobacteria;o__<br>_Legionellales;f__Coxiellaceae;g__Candidatus<br>Berkiella;s__Candidatus Berkiella aquae                               | 85915.4  | Condylostentor auriculatus (n=1/2)                                                                                       | No | Yes | Infection and nuclear interaction in mammalian cells by Candidatus<br>Berkiella cookevillensis, a novel bacterium isolated from amoebae                               |
| k__Bacteria;p__Firmicutes;c__o__;f__;g__;s__endosymbiont<br>'TC1' of Trimyema compressum                                                                                          | 319188.2 | Plagiopyla nasuta (n=1/2)                                                                                                | No | Yes | Morphology and Phylogeny of a New Species of Anaerobic Ciliate,<br>Trimyema finlayi n. sp., with Endosymbiotic Methanogens                                            |

**Table S4. 18 pairs of biological replicates were tested for bacterial consistency.**

Number Of Dominate bacteria = 2 indicates that the dominate taxon has changed, and = 1 indicates that the dominate taxon has not changed.

| PairedID | Sample1 | Sample2 | NumberOfDominateBacteria | pearson_cor  |
|----------|---------|---------|--------------------------|--------------|
| GQ22     | GQ22.1  | GQ22.3  | 1                        | 0.999483714  |
| GQ23     | GQ23.1  | GQ23.2  | 1                        | 0.991507504  |
| GQ42     | GQ42.1  | GQ42.3  | 1                        | 0.994949162  |
| GQ54     | GQ54.1  | GQ54.2  | 1                        | 0.964121461  |
| GQ59     | GQ59.1  | GQ59.2  | 1                        | 0.969622152  |
| GY19     | GY19.2  | GY19.3  | 1                        | 0.999807209  |
| GY22     | GY22.1  | GY22.2  | 1                        | 0.973053189  |
| GY23     | GY23.1  | GY23.3  | 1                        | 0.998939498  |
| GY29     | GY29.1  | GY29.2  | 1                        | 0.986159304  |
| GY34     | GY34.1  | GY34.3  | 1                        | 0.969371921  |
| GY7      | GY7.1   | GY7.2   | 1                        | 0.990581237  |
| GY9      | GY9.1   | GY9.2   | 1                        | 0.998729222  |
| GQ12     | GQ12.1  | GQ12.2  | 2                        | -0.378830798 |
| GY3      | GY3.1   | GY3.2   | 2                        | -0.129132495 |
| GY50     | GY50.1  | GY50.2  | 2                        | 0.06747879   |
| GY57     | GY57.2  | GY57.3  | 2                        | -0.379054331 |
| GY59     | GY59.1  | GY59.2  | 2                        | 0.256232121  |
| GY69     | GY69.1  | GY69.2  | 2                        | 0.309244486  |
